# Supplementary material
Source: PubMed Central journal article supplement (PMC3008624)
Supplement: NIHMS257033-supplement-PDF.pdf [file NIHMS257033-supplement-PDF.pdf]

# Primary Amine-Catalyzed Biginelli Reaction for the Enantioselective Synthesis of 3,4-Dihydropyrimidin-2(1*H*)-ones

Derong Ding and Cong-Gui Zhao\*

Department of Chemistry, University of Texas at San Antonio  
One UTSA Circle, San Antonio, TX 78249-0698

## Supporting Information

### <sup>1</sup>H NMR Data and Spectra

**(*R*)-5-Ethoxycarbonyl-6-methyl-4-phenyl-3,4-dihydropyrimidin-2(1*H*)-one (11a):** White solid, yield 81%;  $[\alpha]_{\text{D}}^{23} = -62.0$  (c 0.52, MeOH); <sup>1</sup>H NMR (500 MHz, CDCl<sub>3</sub>): δ 8.24 (s, 1H), 7.27-7.33 (m, 5H), 5.80 (s, 1H), 5.41 (d, *J* = 2.5, 1H), 4.06-4.11 (m, 2H), 2.35 (s, 3H), 2.86 (t, *J* = 7.0, 3H).

**(*R*)-5-Ethoxycarbonyl-6-methyl-4-(*p*-tolyl)-3,4-dihydropyrimidin-2(1*H*)-one (11b):** White solid, yield 53%;  $[\alpha]_{\text{D}}^{23} = -63.3$  (c 0.57, MeOH); <sup>1</sup>H NMR (300 MHz, CDCl<sub>3</sub>): δ 8.27 (s, 1H), 7.22 (d, *J* = 4.5, 2H), 7.10 (d, *J* = 4.5, 2H), 5.80 (s, 1H), 5.36 (d, *J* = 2.7, 1H), 4.07 (q, *J* = 6.9, 2H), 2.33 (s, 3H), 2.32 (s, 3H), 1.18 (t, *J* = 6.9, 3H).

**(*R*)-5-Ethoxycarbonyl-4-(4-methoxyphenyl)-6-methyl-3,4-dihydropyrimidin-2(1*H*)-one (11c):** White solid, yield 71%;  $[\alpha]_{\text{D}}^{23} = -46.8$  (c 0.55, MeOH); <sup>1</sup>H NMR (300 MHz, CDCl<sub>3</sub>): δ 8.32 (s, 1H), 7.21-7.25 (m, 2H), 6.81-6.84 (m, 2H), 5.83 (s, 1H), 5.34 (d, *J* = 2.7, 1H), 4.03-4.11 (m, 2H), 3.78 (s, 3H), 2.33 (s, 3H), 1.18 (t, *J* = 6.9, 3H).

**(*R*)-5-Ethoxycarbonyl-6-methyl-4-(*o*-tolyl)-3,4-dihydropyrimidin-2(1*H*)-one (11d):** White solid, yield 53%;  $[\alpha]_{\text{D}}^{23} = -36.6$  (c 1.52, MeOH); <sup>1</sup>H NMR (500 MHz, CDCl<sub>3</sub>): δ 8.77 (s, 1H), 7.11-7.16 (m, 3H), 7.25-7.27 (m, 1H), 6.13 (s, 1H), 5.64 (s, 1H), 3.99 (q, *J* = 7.0, 1H), 2.43 (s, 3H), 2.36 (s, 3H), 1.06 (t, *J* = 7.0, 3H).

**(*R*)-5-Ethoxycarbonyl-4-(4-fluorophenyl)-6-methyl-3,4-dihydropyrimidin-2(1*H*)-one (11e):** White solid, yield 61%;  $[\alpha]_{\text{D}}^{23} = -66.9$  (c 0.52, MeOH); <sup>1</sup>H NMR (300 MHz, CDCl<sub>3</sub>): δ 8.23 (s, 1H), 7.25-7.30 (m, 2H), 6.95-7.01 (m, 2H), 5.87 (s, 1H), 5.38 (d, *J* = 2.7, 1H), 4.03-4.11 (m, 2H), 2.34 (s, 3H), 1.17 (t, *J* = 7.2, 3H).

**(*R*)-5-Ethoxycarbonyl-4-(4-chlorophenyl)-6-methyl-3,4-dihydropyrimidin-2(1*H*)-one (11f):** White solid, yield 63%;  $[\alpha]_{\text{D}}^{23} = -79.5$  (c 0.52, MeOH); <sup>1</sup>H NMR (500 MHz, CDCl<sub>3</sub>): δ 8.52 (s, 1H), 7.24-7.29 (m, 4H), 6.20 (s, 1H), 5.37 (d, *J* = 2.5, 1H), 4.06-4.11 (m, 2H), 2.33 (s, 3H), 1.18 (t, *J* = 7.5, 3H).

**(*R*)-4-(4-Bromophenyl)-5-ethoxycarbonyl-6-methyl-3,4-dihydropyrimidin-2(1*H*)-one (11g):**

Pale solid, yield 68%;  $[\alpha]_D^{23} = -70.6$  (c 0.57, MeOH);  $^1\text{H NMR}$  (500 MHz,  $\text{CDCl}_3$ ):  $\delta$  8.50 (s, 1H), 7.43 (d,  $J = 8.5$ , 2H), 7.19 (d,  $J = 8.5$ , 2H), 6.18 (s, 1H), 5.36 (d,  $J = 3.0$ , 1H), 4.06-4.11 (m, 2H), 2.32 (s, 3H), 1.18 (t,  $J = 7.0$ , 3H).

**(R)-4-(4-Cyanophenyl)-5-ethoxycarbonyl-6-methyl-3,4-dihydropyrimidin-2(1H)-one (11h):**  
White solid, yield 20%;  $[\alpha]_D^{23} = -85.5$  (c 0.71, MeOH);  $^1\text{H NMR}$  (500 MHz,  $\text{CDCl}_3$ ):  $\delta$  8.41 (s, 1H), 7.62 (d,  $J = 8.5$ , 2H), 7.44 (d,  $J = 8.5$ , 2H), 6.17 (s, 1H), 5.46 (d,  $J = 3.0$ , 1H), 4.06-4.13 (m, 2H), 2.34 (s, 3H), 1.18 (t,  $J = 7.5$ , 3H).

**(R)-5-Ethoxycarbonyl-6-methyl-4-(4-nitrophenyl)-3,4-dihydropyrimidin-2(1H)-one (11i):**  
Pale yellow solid, yield 14%;  $[\alpha]_D^{23} = -52.6$  (c 0.375,  $\text{CHCl}_3$ );  $^1\text{H NMR}$  (300 MHz,  $\text{DMSO}-d_6$ ):  $\delta$  8.32 (s, 1H), 8.18-8.20 (m, 2H), 7.87 (s, 1H), 7.47-7.50 (m, 2H), 5.26 (d,  $J = 3.3$ , 1H), 3.97 (q,  $J = 7.2$ , 1H), 2.58 (s, 3H), 1.09 (t,  $J = 7.2$ , 3H).

**(R)-5-Ethoxycarbonyl-6-methyl-4-(3-nitrophenyl)-3,4-dihydropyrimidin-2(1H)-one (11j):**  
White solid, 21% yield;  $[\alpha]_D^{25} = -83.6$  (c 0.1,  $\text{CHCl}_3$ );  $^1\text{H NMR}$  (500 MHz,  $d_6$ -DMSO):  $\delta$  9.36 (s, 1H), 8.13 (dd,  $J = 1.3, 7.7$  Hz, 1H), 8.07 (s, 1H), 7.98 (br s, 1H), 7.70-7.61 (m, 2H), 5.30 (d,  $J = 3.3$  Hz, 1H), 3.99 (m, 2H), 2.27 (s, 3H), 1.10 (t,  $J = 7.3$  Hz, 1H).

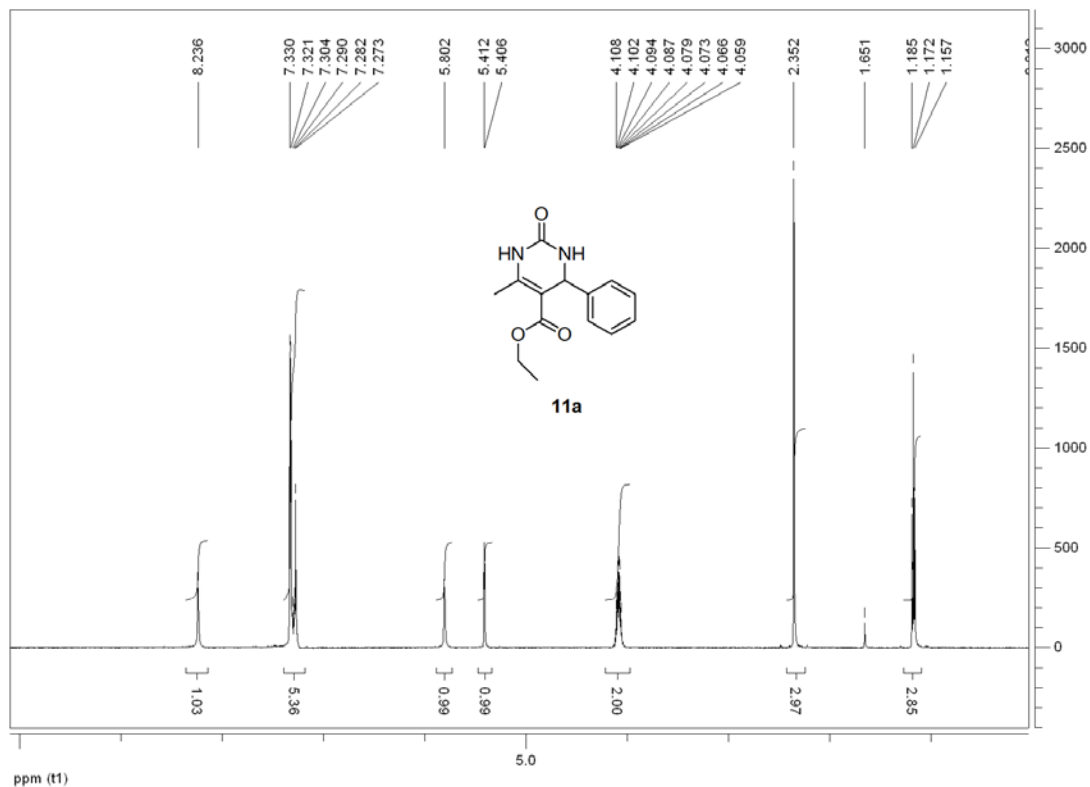

$^1\text{H NMR}$  of **11a**

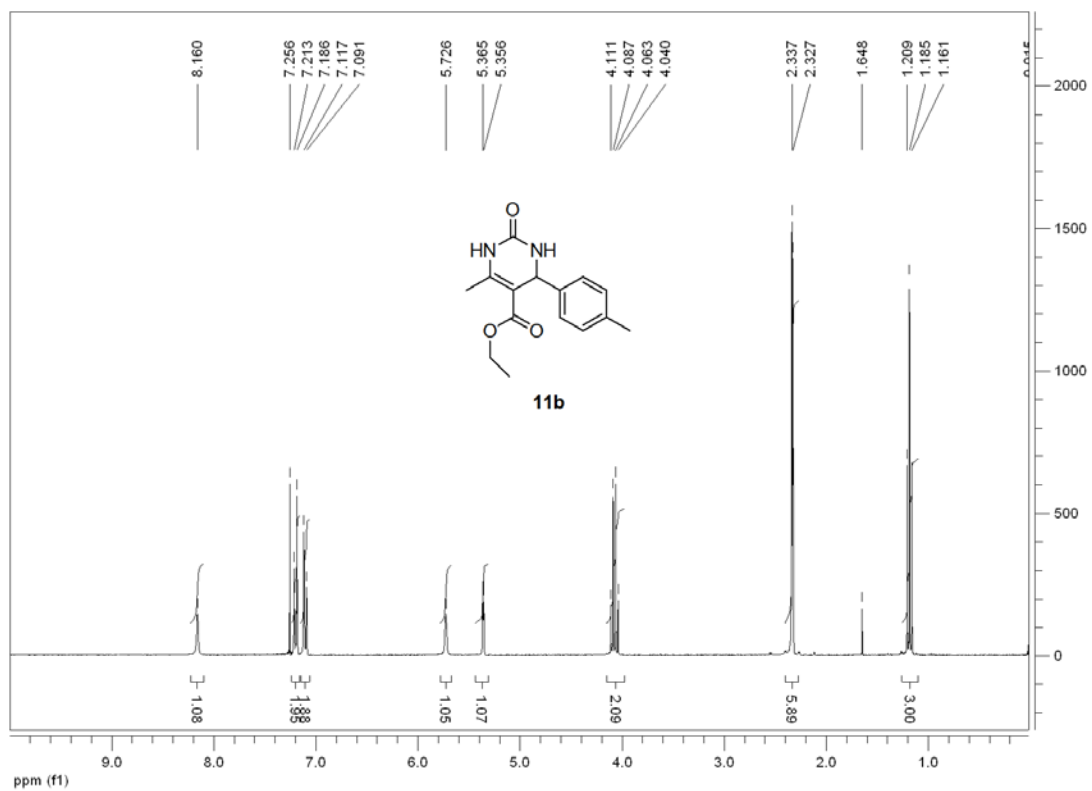

<sup>1</sup>H NMR of **11b**

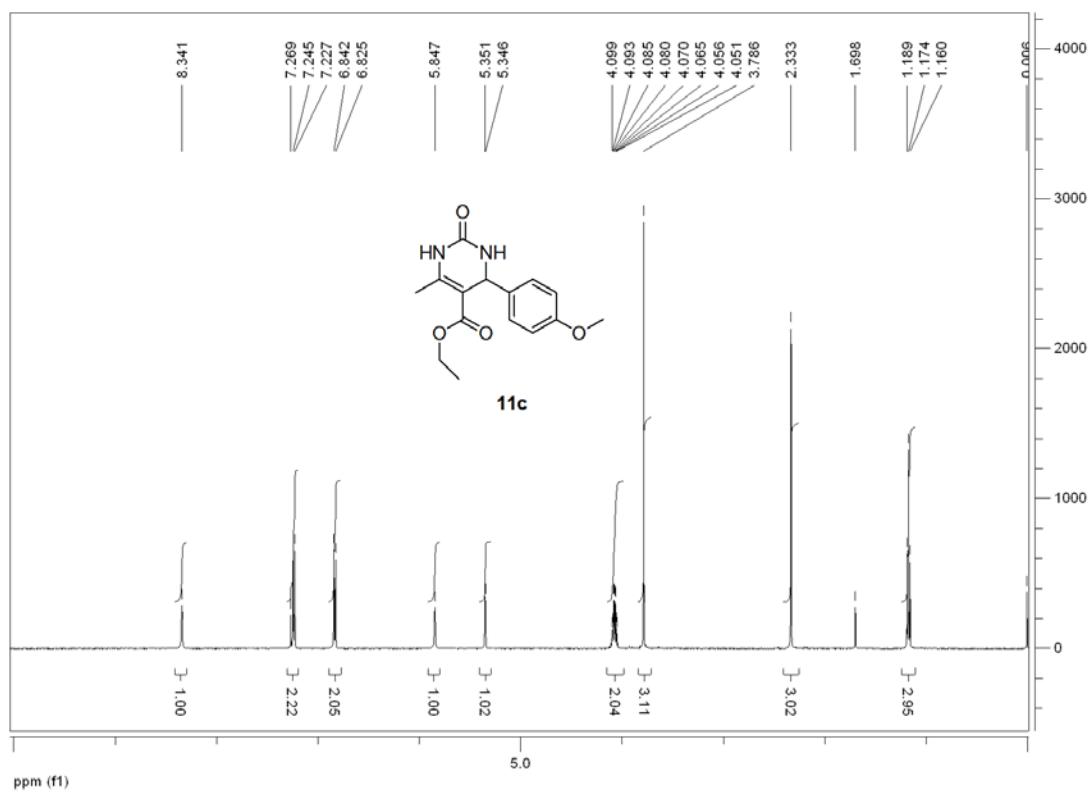

<sup>1</sup>H NMR of **11c**

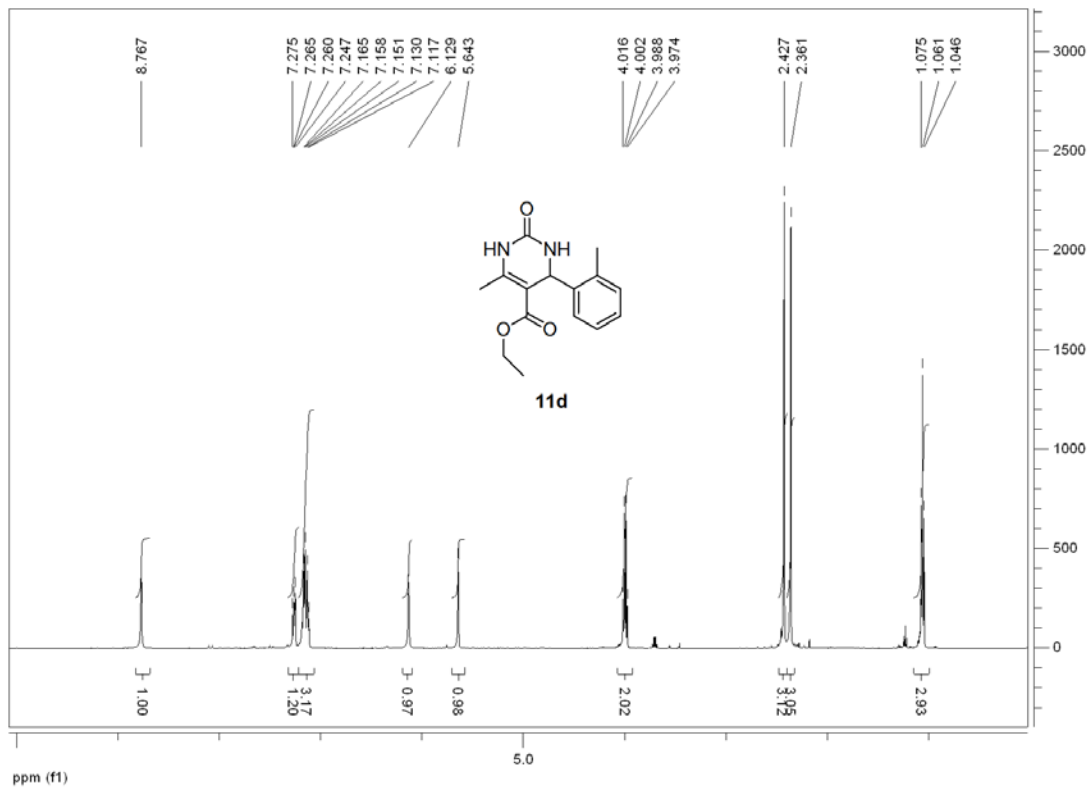

<sup>1</sup>H NMR of **11d**

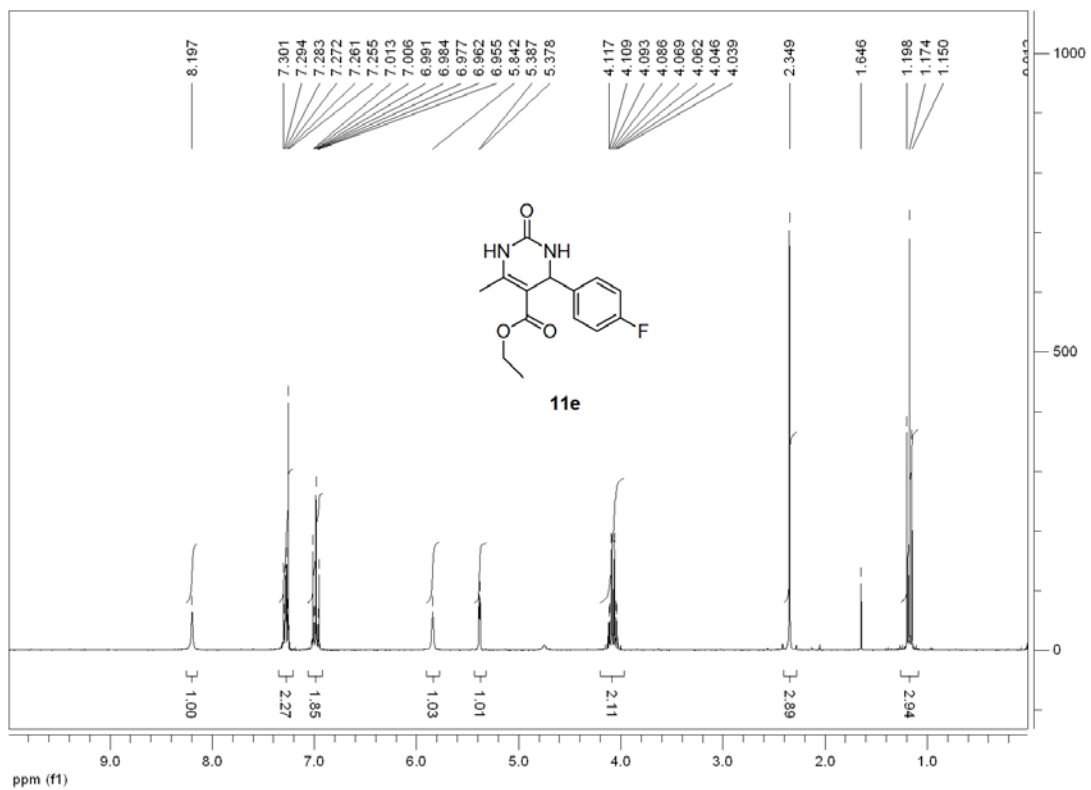

<sup>1</sup>H NMR of **11e**

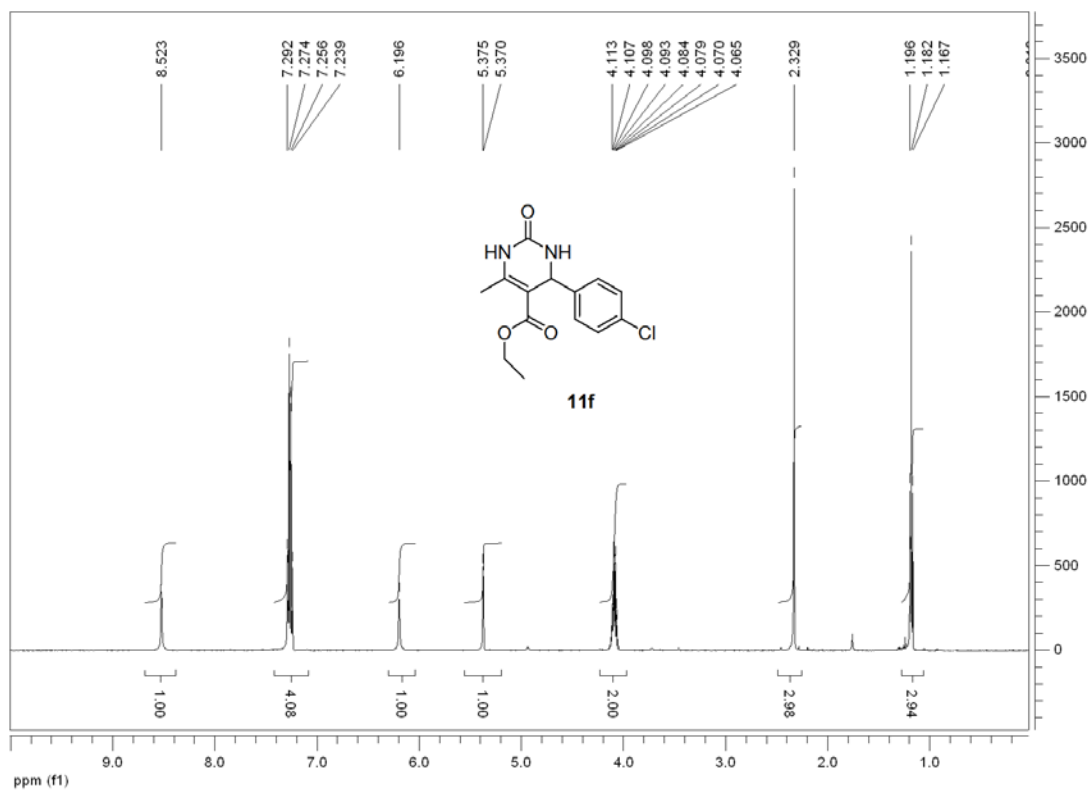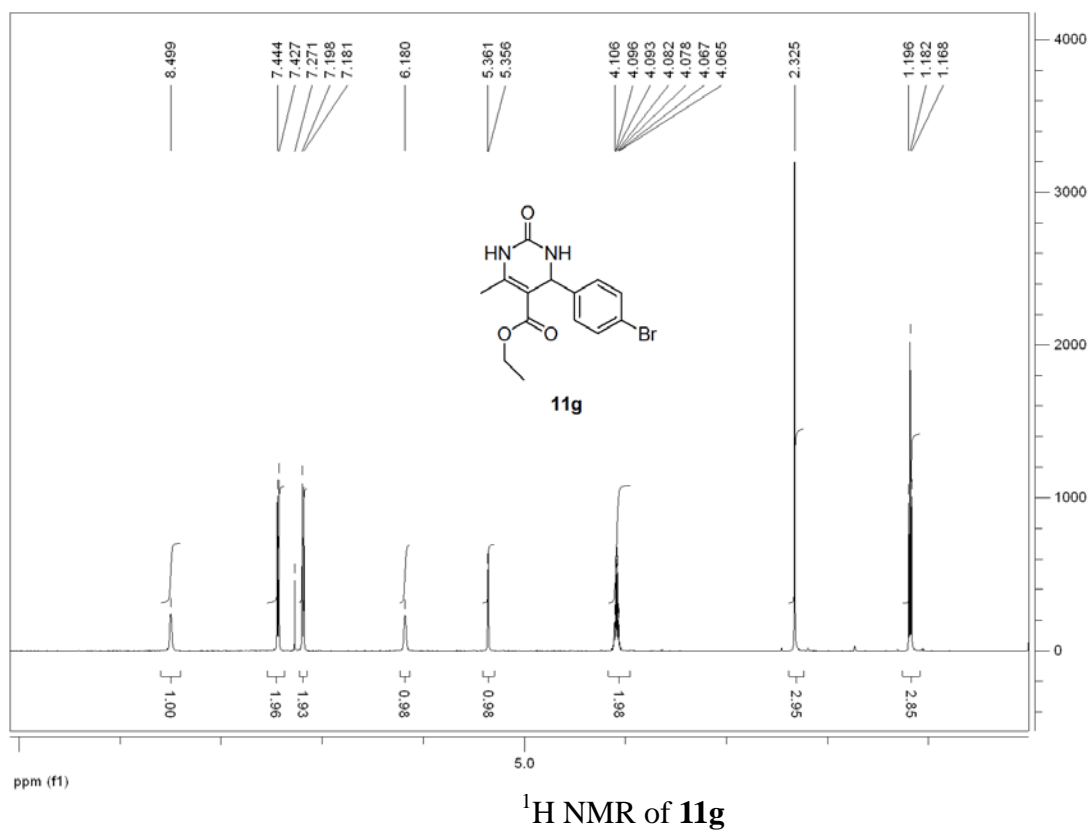

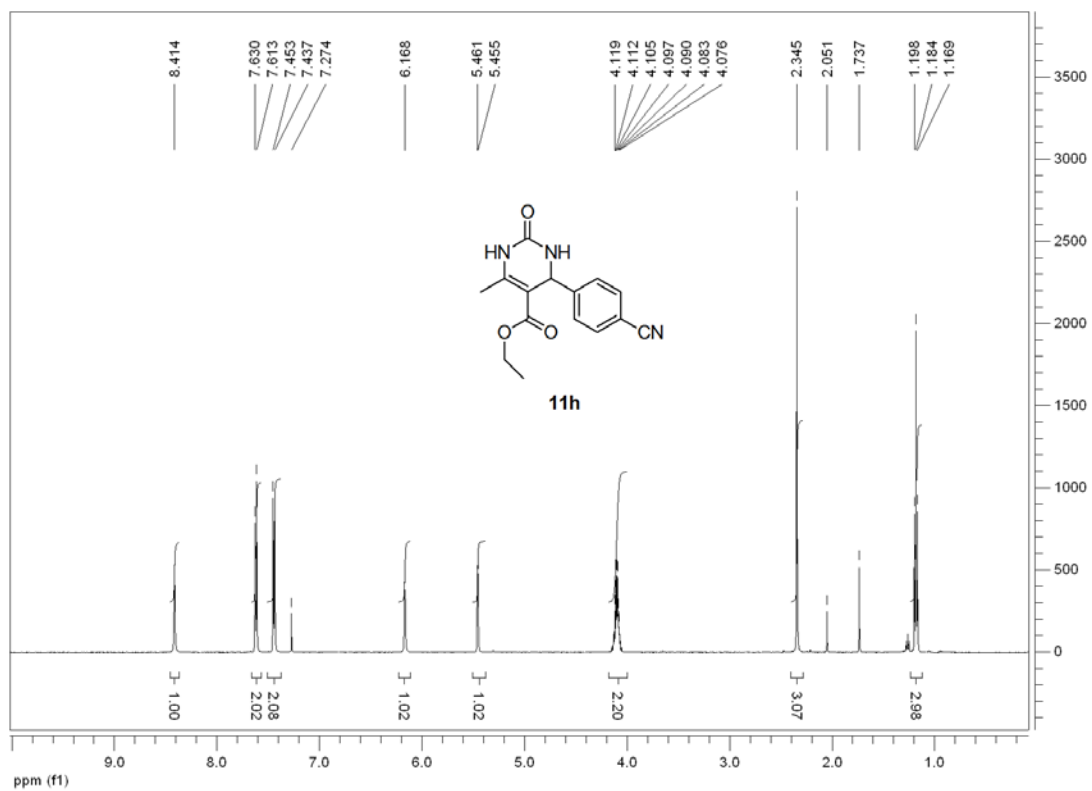

**<sup>1</sup>H NMR of 11h**

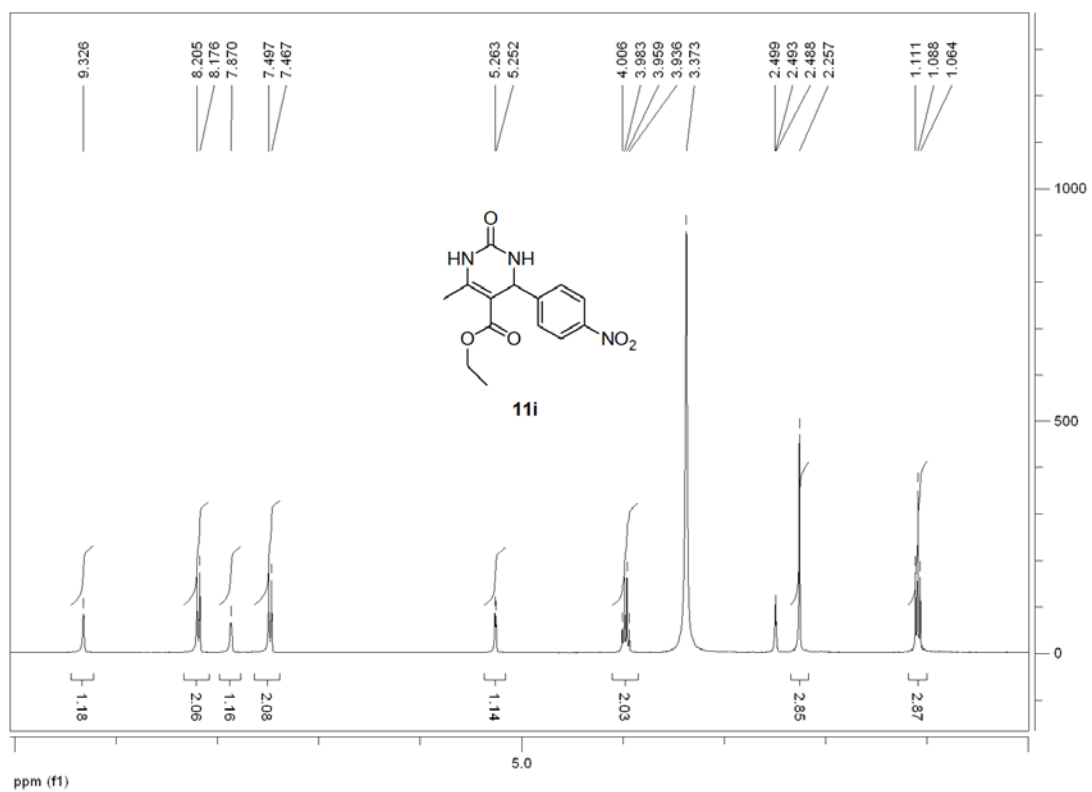

**<sup>1</sup>H NMR of 11i**

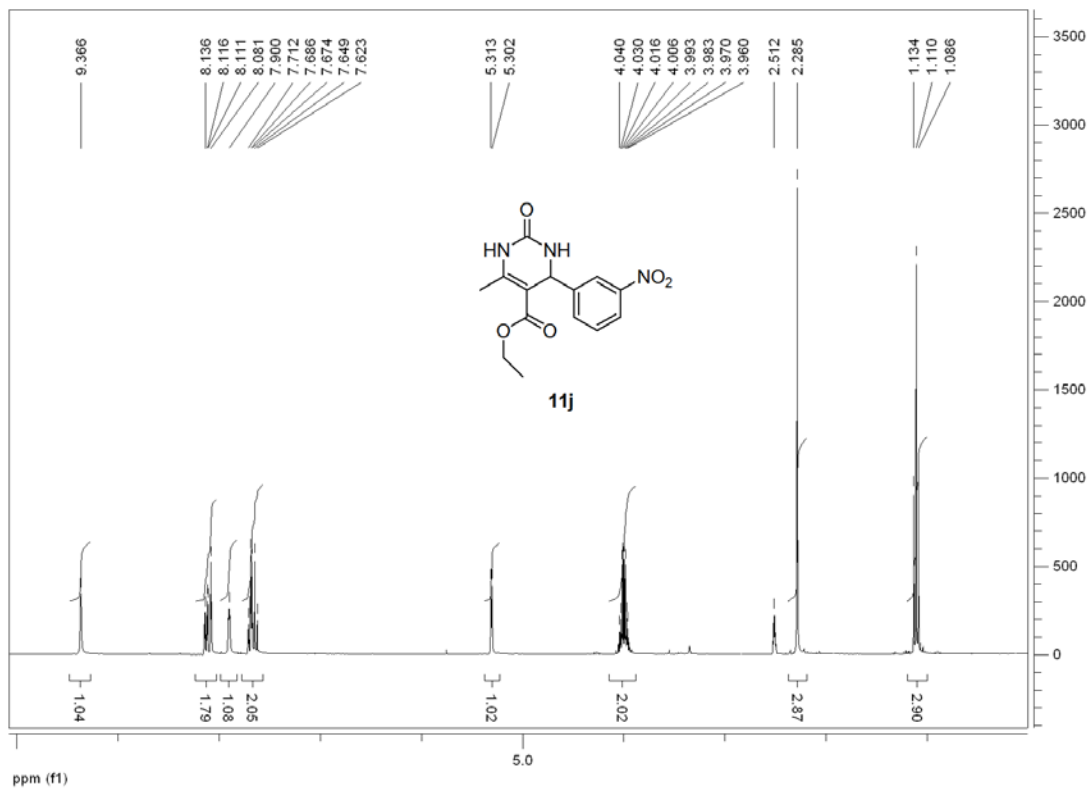

**<sup>1</sup>H NMR of 11j**

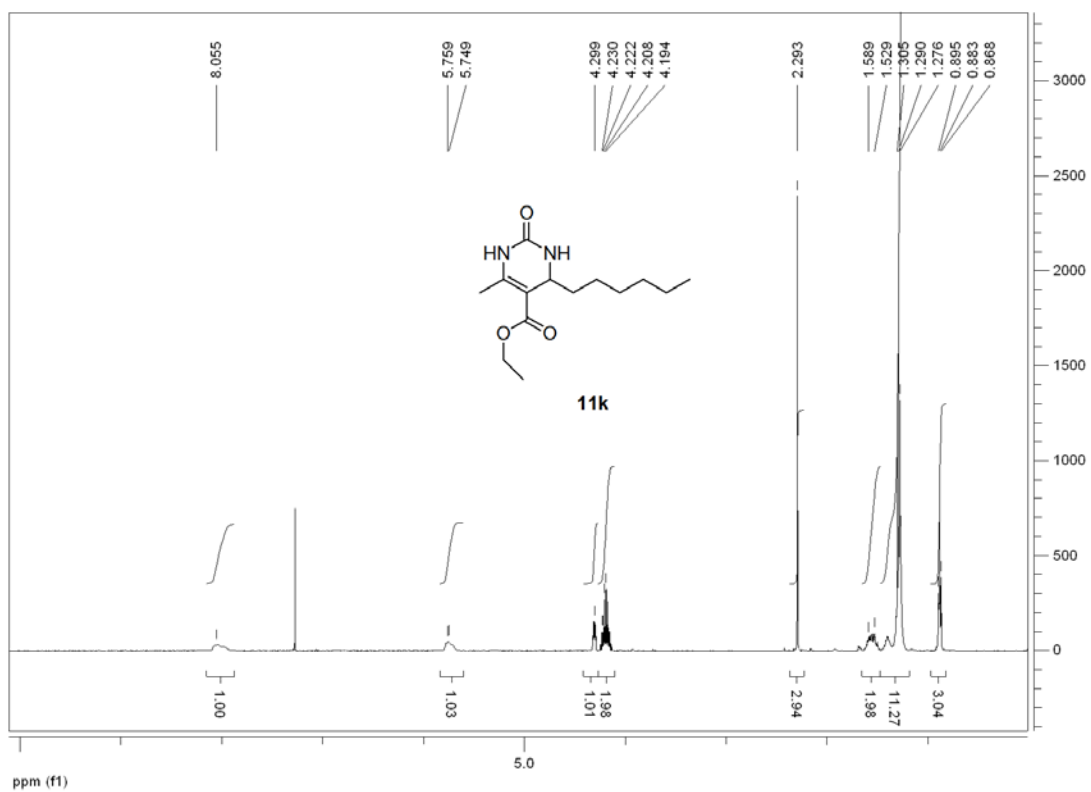

**<sup>1</sup>H NMR of 11k**

**Table 3. HPLC Conditions**

| Compound                                                                            | Column         | <i>i</i> -PrOH/hexane | Flow rate (mL/min) | UV detection (nm) |
|-------------------------------------------------------------------------------------|----------------|-----------------------|--------------------|-------------------|
| 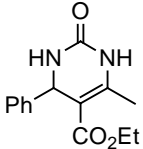   | ChiralCel OD-H | 15:85                 | 1.0                | 254               |
|    | ChiralCel OD-H | 15:85                 | 1.0                | 254               |
|    | ChiralCel OD-H | 15:85                 | 1.0                | 254               |
|   | ChiralPak AD-H | 20:80                 | 1.0                | 254               |
|  | ChiralCel OD-H | 15:85                 | 1.0                | 254               |
|  | ChiralCel OD-H | 15:85                 | 1.0                | 254               |
|  | ChiralCel OD-H | 15:85                 | 1.0                | 254               |
|  | ChiralCel OD-H | 15:85                 | 1.0                | 254               |
|  | ChiralCel OD-H | 15:85                 | 1.0                | 254               |



|                                                                                                                                                                                                                                                                                                                                                                                                                                                              |                |       |     |     |
|--------------------------------------------------------------------------------------------------------------------------------------------------------------------------------------------------------------------------------------------------------------------------------------------------------------------------------------------------------------------------------------------------------------------------------------------------------------|----------------|-------|-----|-----|
| 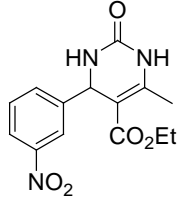 <p>Chemical structure: A chiral amide derivative. The central carbon is bonded to a p-nitrophenyl group, a methyl group, and a nitrogen atom. The nitrogen atom is part of a cyclic urea-like structure with a carbonyl group (=O) and another nitrogen atom. The second carbon of this ring is bonded to a methyl group and an ethyl ester group (-CO<sub>2</sub>Et).</p> | ChiralPak AD-H | 10:90 | 1.0 | 254 |
|  <p>Chemical structure: A chiral amide derivative. The central carbon is bonded to an n-hexyl group, a methyl group, and a nitrogen atom. The nitrogen atom is part of a cyclic urea-like structure with a carbonyl group (=O) and another nitrogen atom. The second carbon of this ring is bonded to a methyl group and an ethyl ester group (-CO<sub>2</sub>Et).</p>      | ChiralCel OD-H | 12:88 | 1.0 | 254 |

# ==== Shimadzu LCsolution LC Data Image ====

## <Chromatogram>

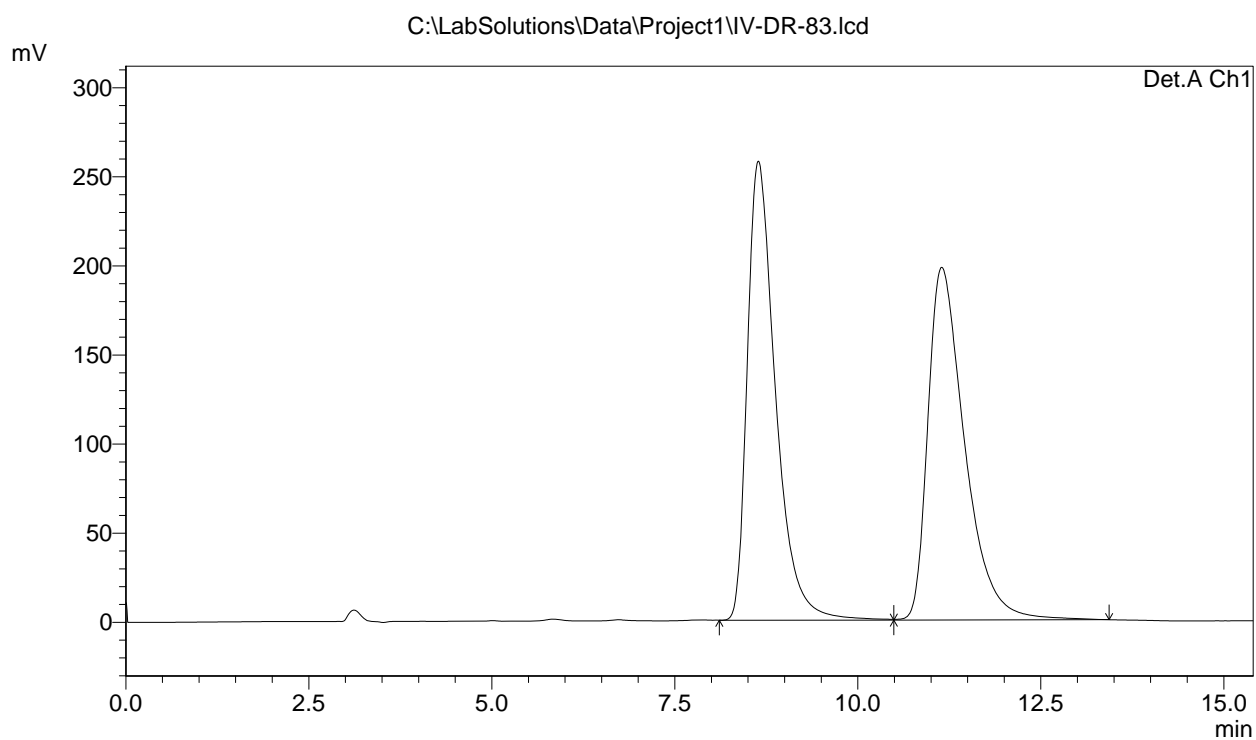

PeakTable

Detector A Ch1 226nm

| Peak# | Ret. Time | Area     | Height | Area %  | Height % |
|-------|-----------|----------|--------|---------|----------|
| 1     | 8.637     | 6917814  | 257717 | 50.024  | 56.565   |
| 2     | 11.142    | 6911228  | 197899 | 49.976  | 43.435   |
| Total |           | 13829041 | 455617 | 100.000 | 100.000  |

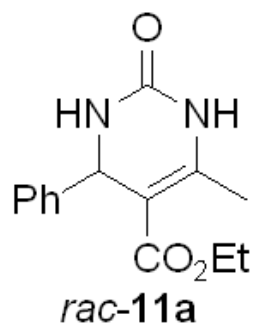

# ==== Shimadzu LCsolution LC Data Image ====

## <Chromatogram>

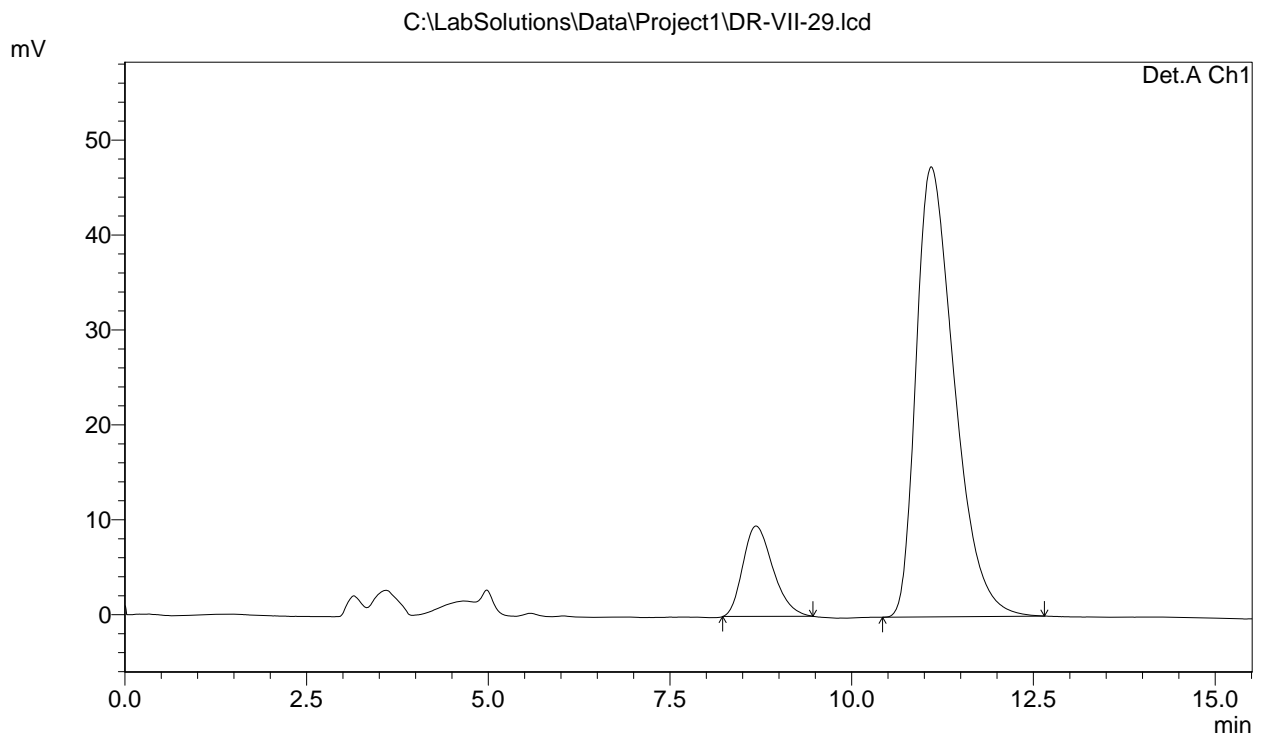

PeakTable

Detector A Ch1 254nm

| Peak# | Ret. Time | Area    | Height | Area %  | Height % |
|-------|-----------|---------|--------|---------|----------|
| 1     | 8.679     | 273312  | 9527   | 13.619  | 16.728   |
| 2     | 11.089    | 1733565 | 47425  | 86.381  | 83.272   |
| Total |           | 2006878 | 56952  | 100.000 | 100.000  |

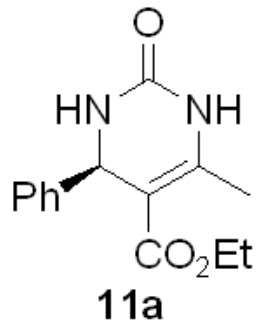

# ==== Shimadzu LCsolution LC Data Image ====

## <Chromatogram>

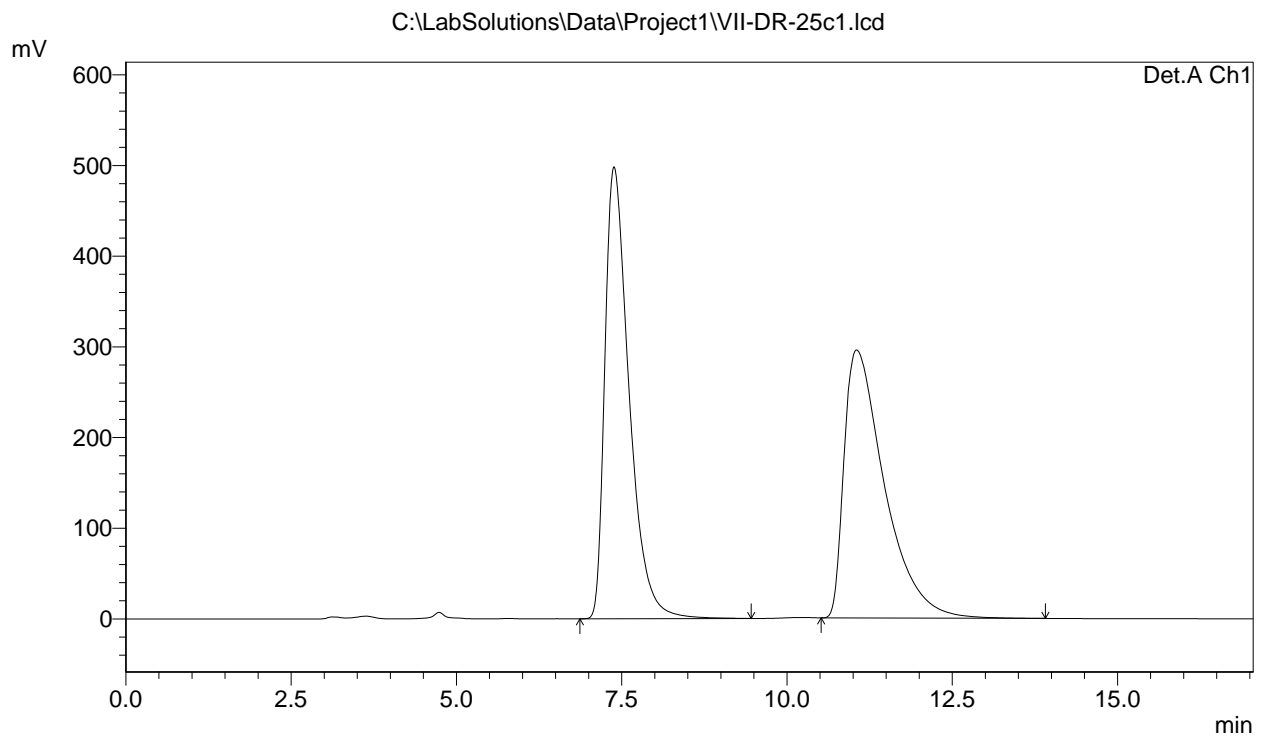

PeakTable

Detector A Ch1 254nm

| Peak# | Ret. Time | Area     | Height | Area %  | Height % |
|-------|-----------|----------|--------|---------|----------|
| 1     | 7.379     | 12676607 | 498461 | 50.212  | 62.779   |
| 2     | 11.049    | 12569519 | 295527 | 49.788  | 37.221   |
| Total |           | 25246126 | 793989 | 100.000 | 100.000  |

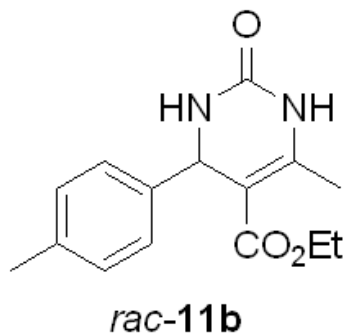

# ==== Shimadzu LCsolution LC Data Image ====

## <Chromatogram>

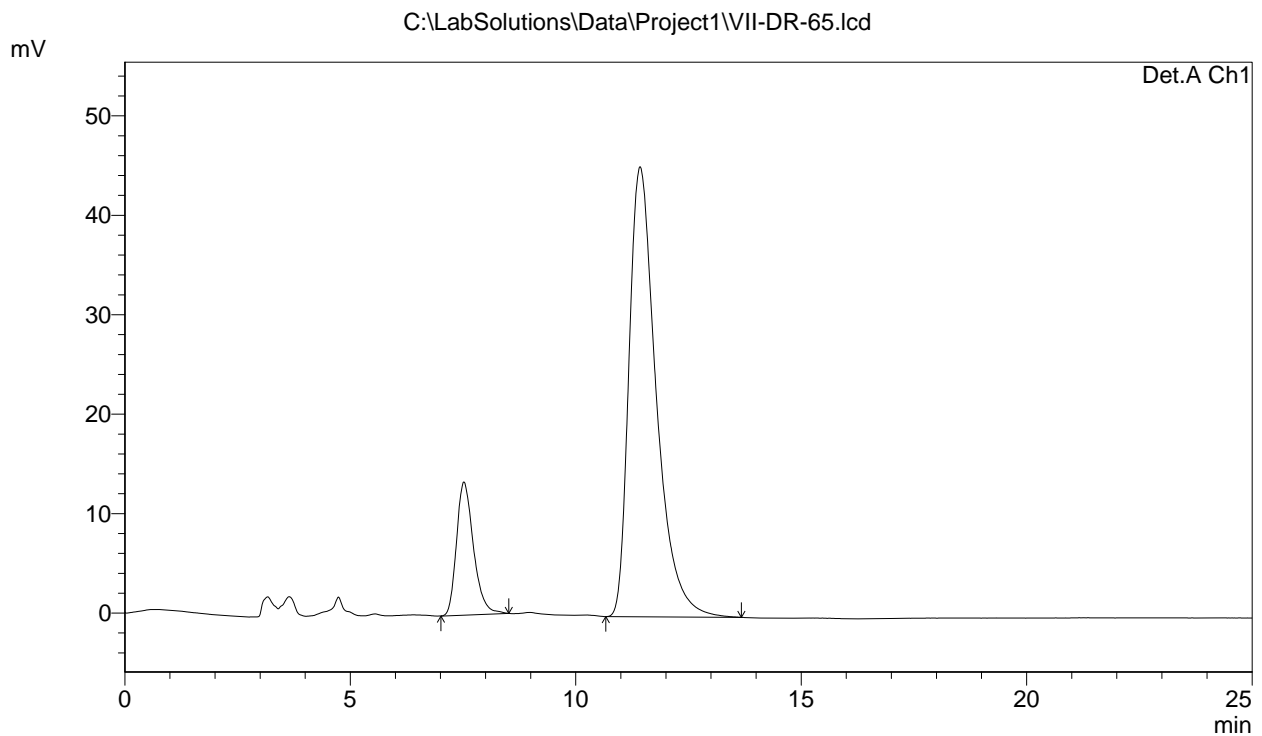

PeakTable

Detector A Ch1 254nm

| Peak# | Ret. Time | Area    | Height | Area %  | Height % |
|-------|-----------|---------|--------|---------|----------|
| 1     | 7.515     | 350827  | 13398  | 15.579  | 22.844   |
| 2     | 11.421    | 1901055 | 45252  | 84.421  | 77.156   |
| Total |           | 2251882 | 58650  | 100.000 | 100.000  |

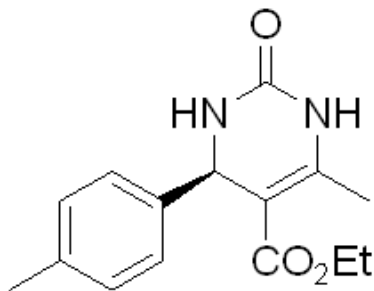

**11b**

# ==== Shimadzu LCsolution LC Data Image ====

## <Chromatogram>

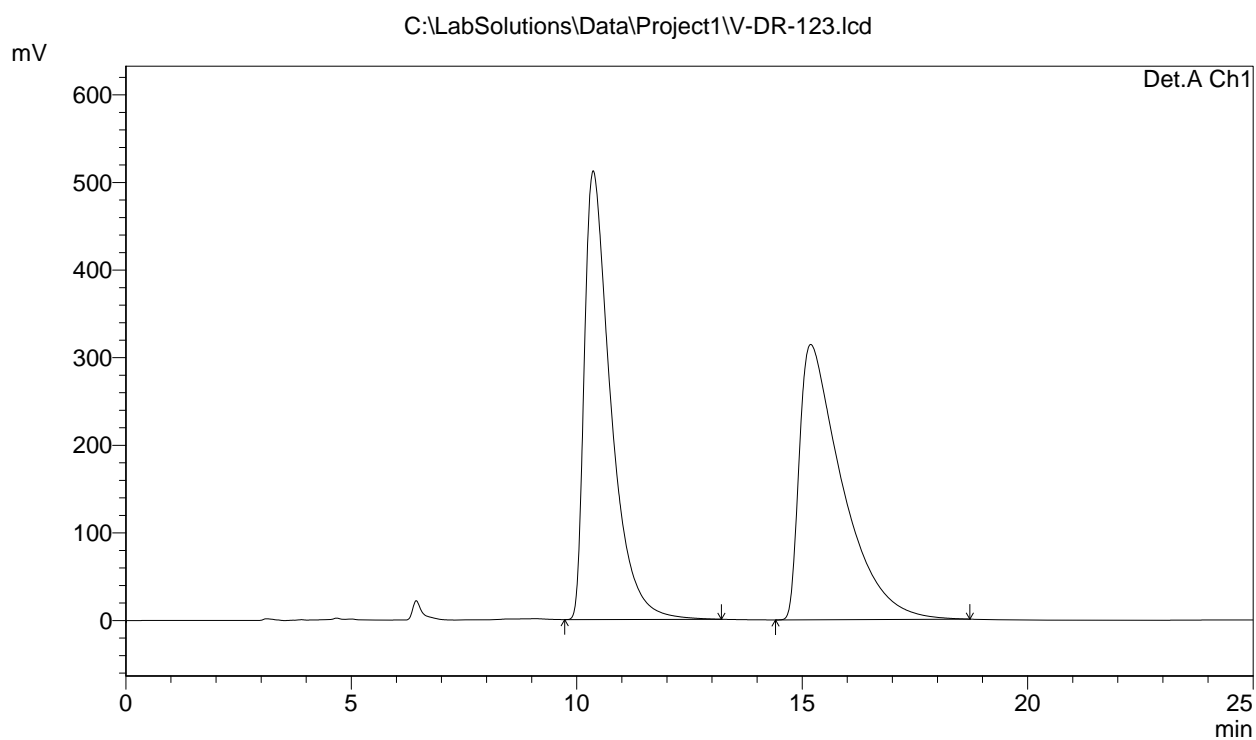

PeakTable

Detector A Ch1 254nm

| Peak# | Ret. Time | Area     | Height | Area %  | Height % |
|-------|-----------|----------|--------|---------|----------|
| 1     | 10.360    | 20828971 | 512289 | 50.069  | 61.970   |
| 2     | 15.184    | 20771242 | 314389 | 49.931  | 38.030   |
| Total |           | 41600213 | 826678 | 100.000 | 100.000  |

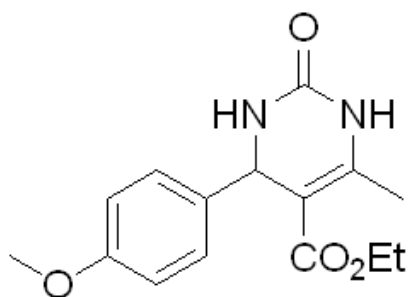

*rac-11c*

# ==== Shimadzu LCsolution LC Data Image ====

## <Chromatogram>

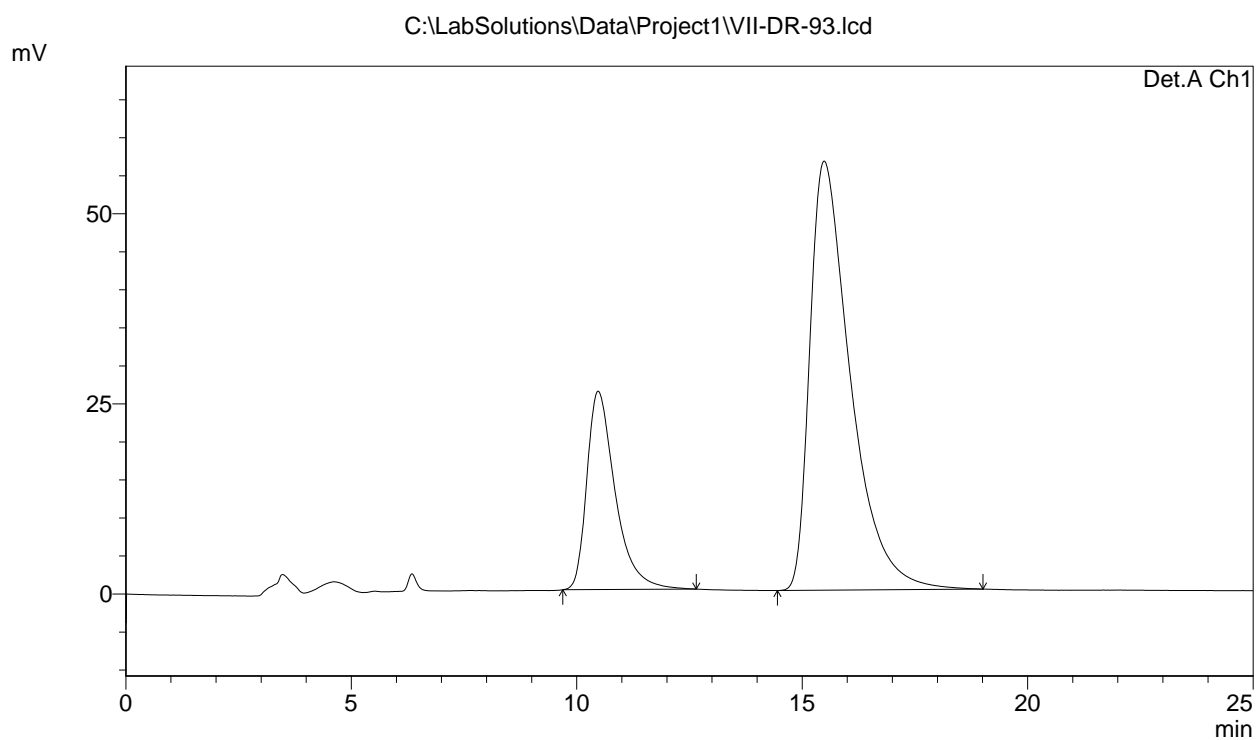

PeakTable

Detector A Ch1 254nm

| Peak# | Ret. Time | Area    | Height | Area %  | Height % |
|-------|-----------|---------|--------|---------|----------|
| 1     | 10.471    | 1139510 | 26096  | 24.409  | 31.623   |
| 2     | 15.483    | 3528985 | 56426  | 75.591  | 68.377   |
| Total |           | 4668495 | 82522  | 100.000 | 100.000  |

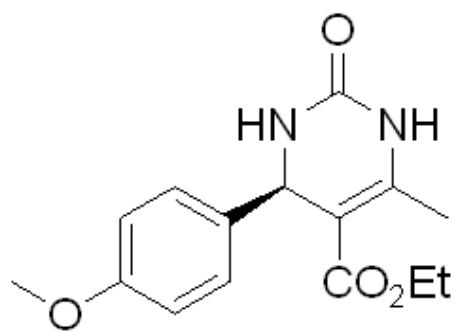

**11c**

# ==== Shimadzu LCsolution LC Data Image ====

## <Chromatogram>

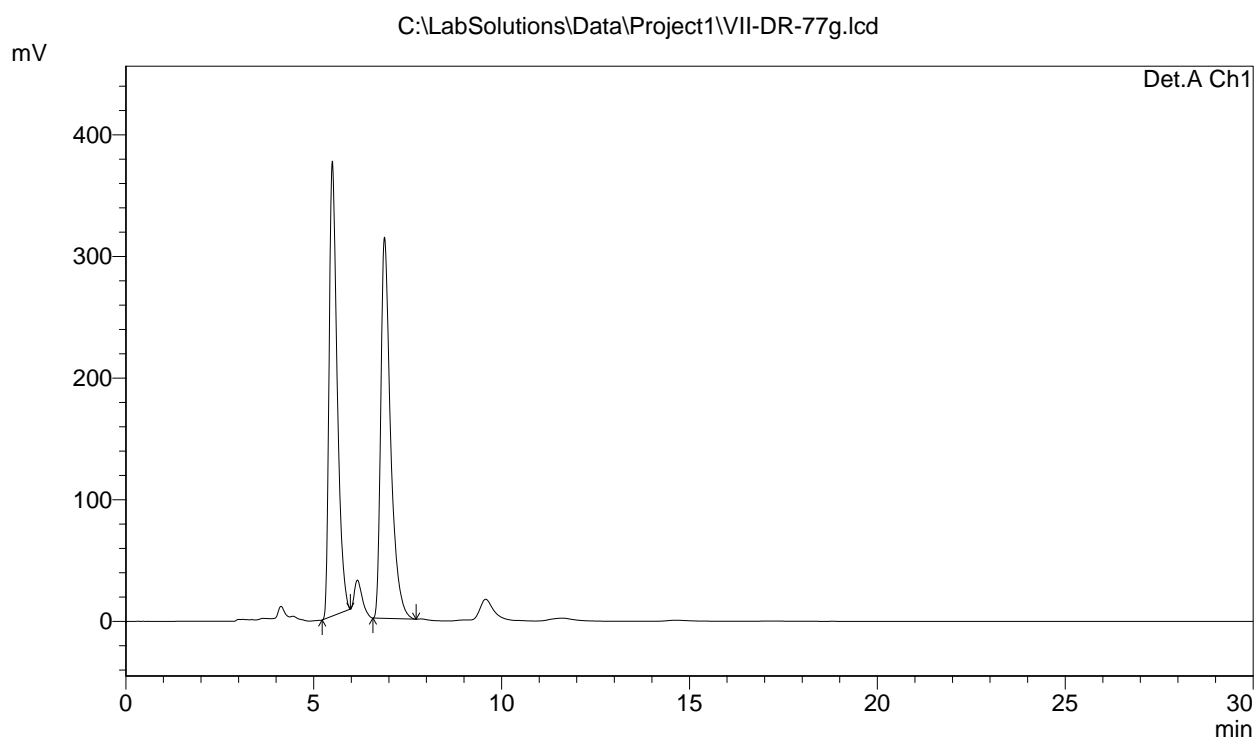

PeakTable

Detector A Ch1 254nm

| Peak# | Ret. Time | Area     | Height | Area %  | Height % |
|-------|-----------|----------|--------|---------|----------|
| 1     | 5.490     | 5584650  | 374144 | 49.576  | 54.415   |
| 2     | 6.880     | 5680197  | 313437 | 50.424  | 45.585   |
| Total |           | 11264847 | 687581 | 100.000 | 100.000  |

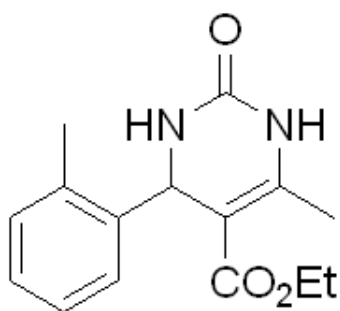

*rac-11d*



# ==== Shimadzu LCsolution LC Data Image ====

## <Chromatogram>

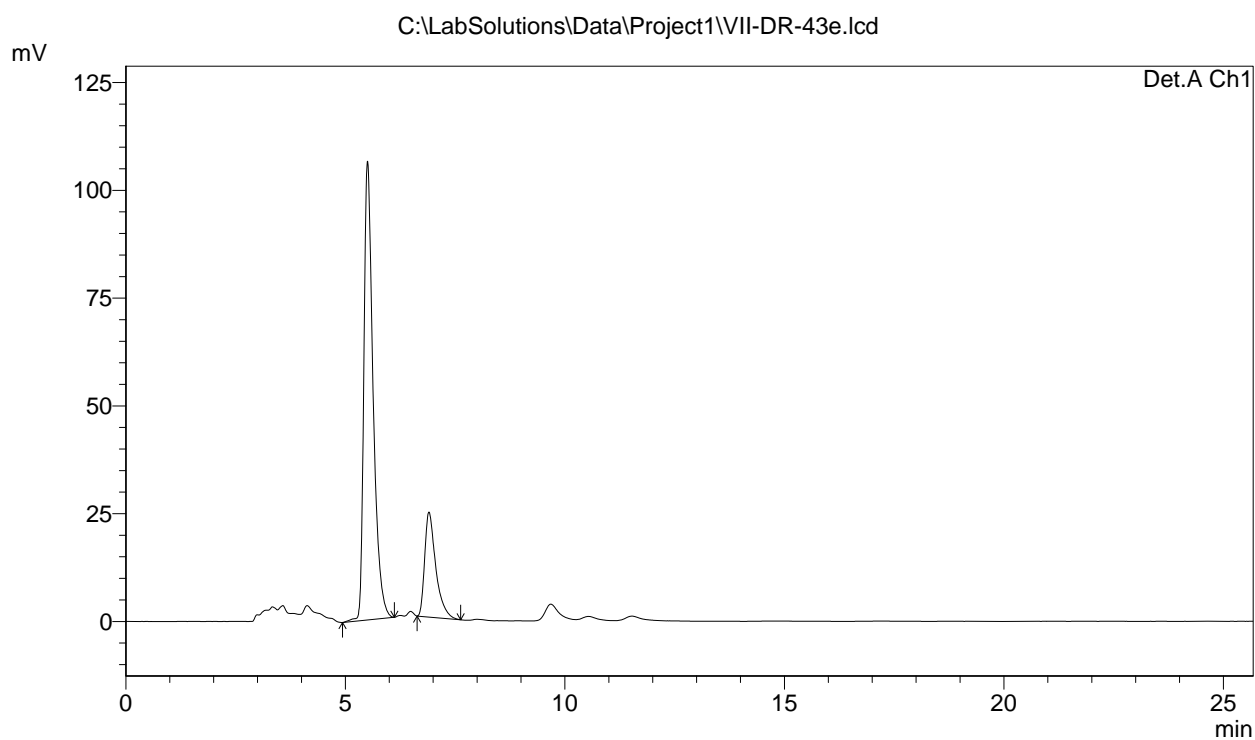

PeakTable

Detector A Ch1 254nm

| Peak# | Ret. Time | Area    | Height | Area %  | Height % |
|-------|-----------|---------|--------|---------|----------|
| 1     | 5.500     | 1561298 | 106368 | 78.581  | 81.377   |
| 2     | 6.899     | 425559  | 24342  | 21.419  | 18.623   |
| Total |           | 1986858 | 130710 | 100.000 | 100.000  |

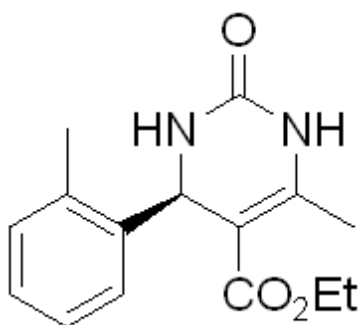

**11d**

# ==== Shimadzu LCsolution LC Data Image ====

## <Chromatogram>

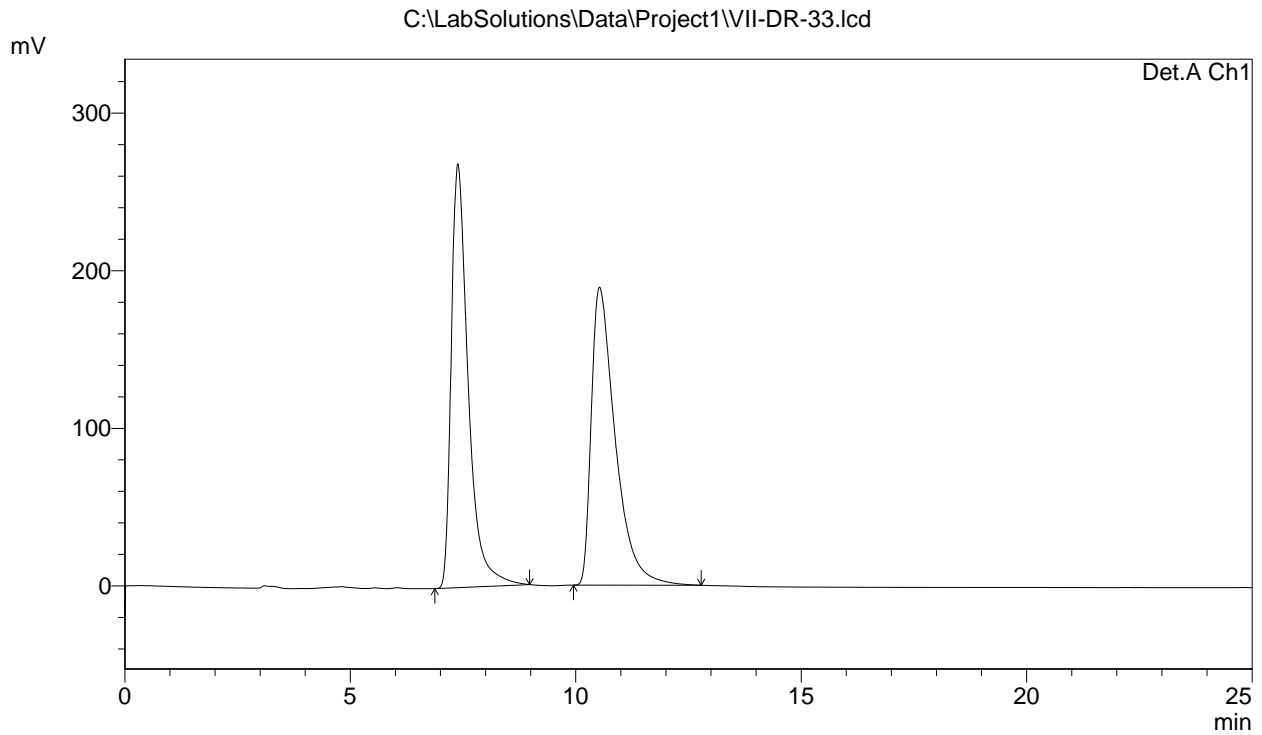

PeakTable

Detector A Ch1 254nm

| Peak# | Ret. Time | Area     | Height | Area %  | Height % |
|-------|-----------|----------|--------|---------|----------|
| 1     | 7.379     | 7043586  | 269018 | 50.242  | 58.721   |
| 2     | 10.524    | 6975699  | 189111 | 49.758  | 41.279   |
| Total |           | 14019285 | 458130 | 100.000 | 100.000  |

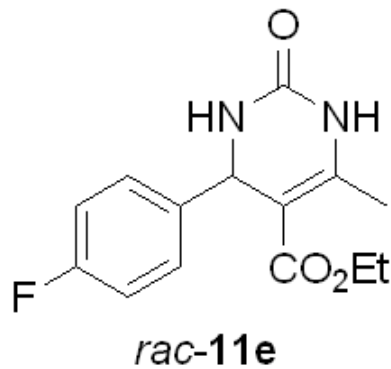

# ==== Shimadzu LCsolution LC Data Image ====

## <Chromatogram>

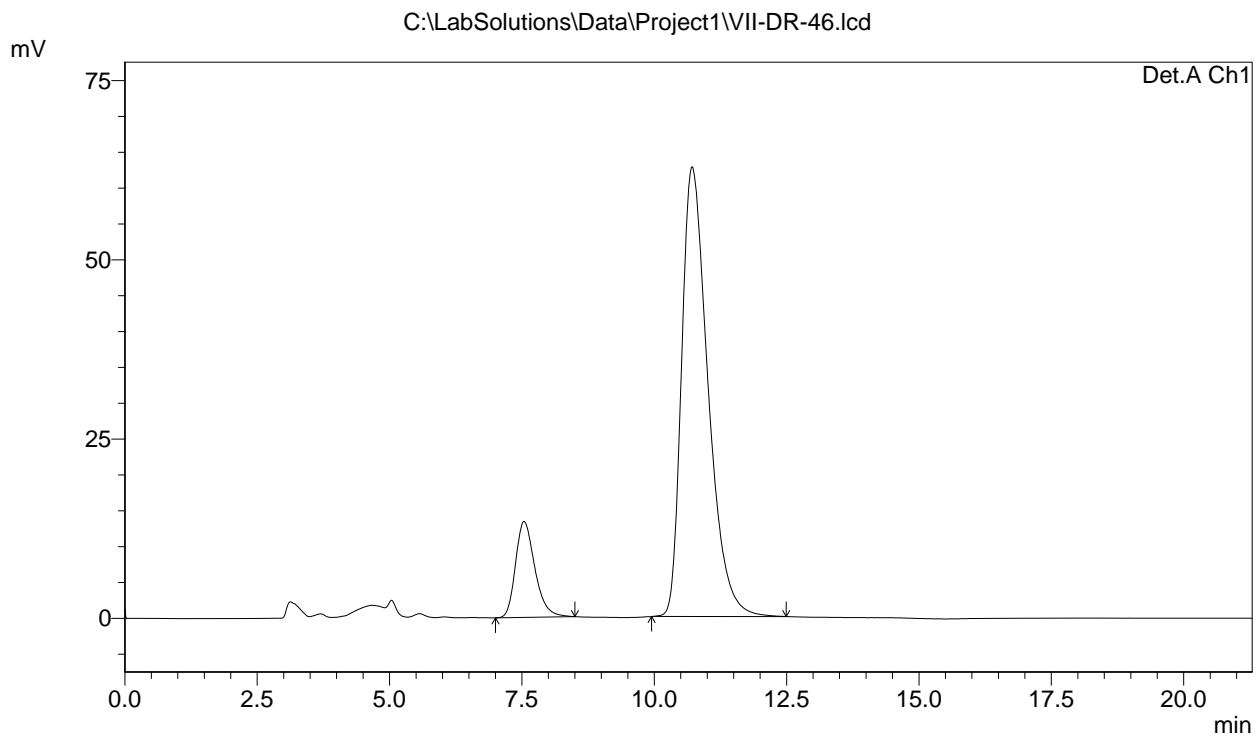

PeakTable

Detector A Ch1 254nm

| Peak# | Ret. Time | Area    | Height | Area %  | Height % |
|-------|-----------|---------|--------|---------|----------|
| 1     | 7.535     | 340677  | 13406  | 13.539  | 17.607   |
| 2     | 10.711    | 2175503 | 62736  | 86.461  | 82.393   |
| Total |           | 2516180 | 76142  | 100.000 | 100.000  |

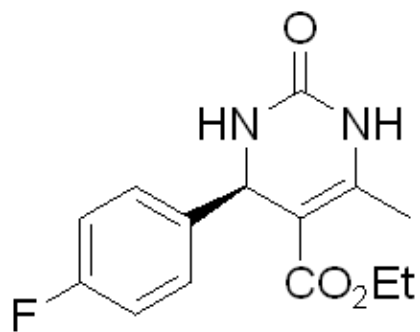

**11e**

# ==== Shimadzu LCsolution LC Data Image ====

## <Chromatogram>

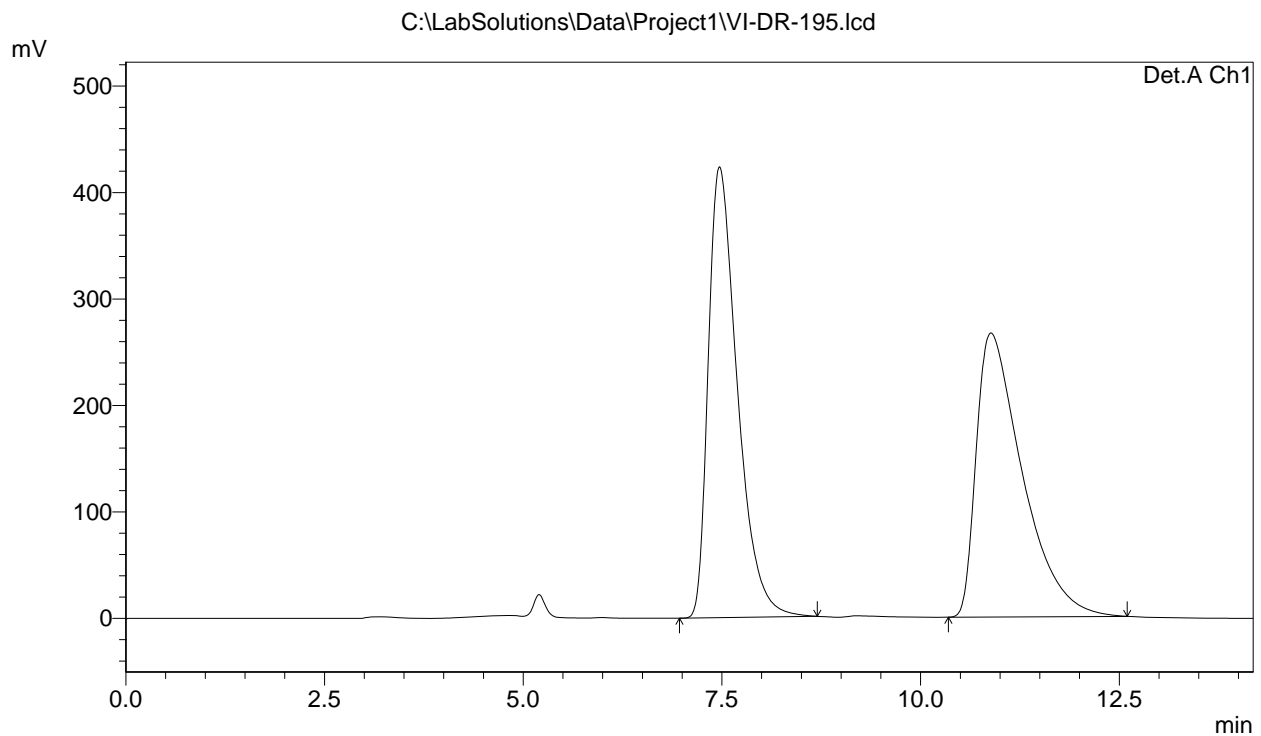

PeakTable

Detector A Ch1 254nm

| Peak# | Ret. Time | Area     | Height | Area %  | Height % |
|-------|-----------|----------|--------|---------|----------|
| 1     | 7.465     | 10778505 | 423554 | 50.100  | 61.347   |
| 2     | 10.880    | 10735360 | 266864 | 49.900  | 38.653   |
| Total |           | 21513865 | 690418 | 100.000 | 100.000  |

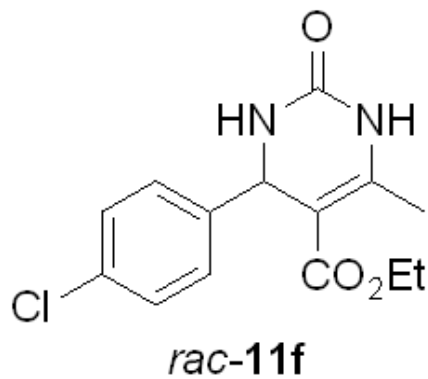

# ==== Shimadzu LCsolution LC Data Image ====

## <Chromatogram>

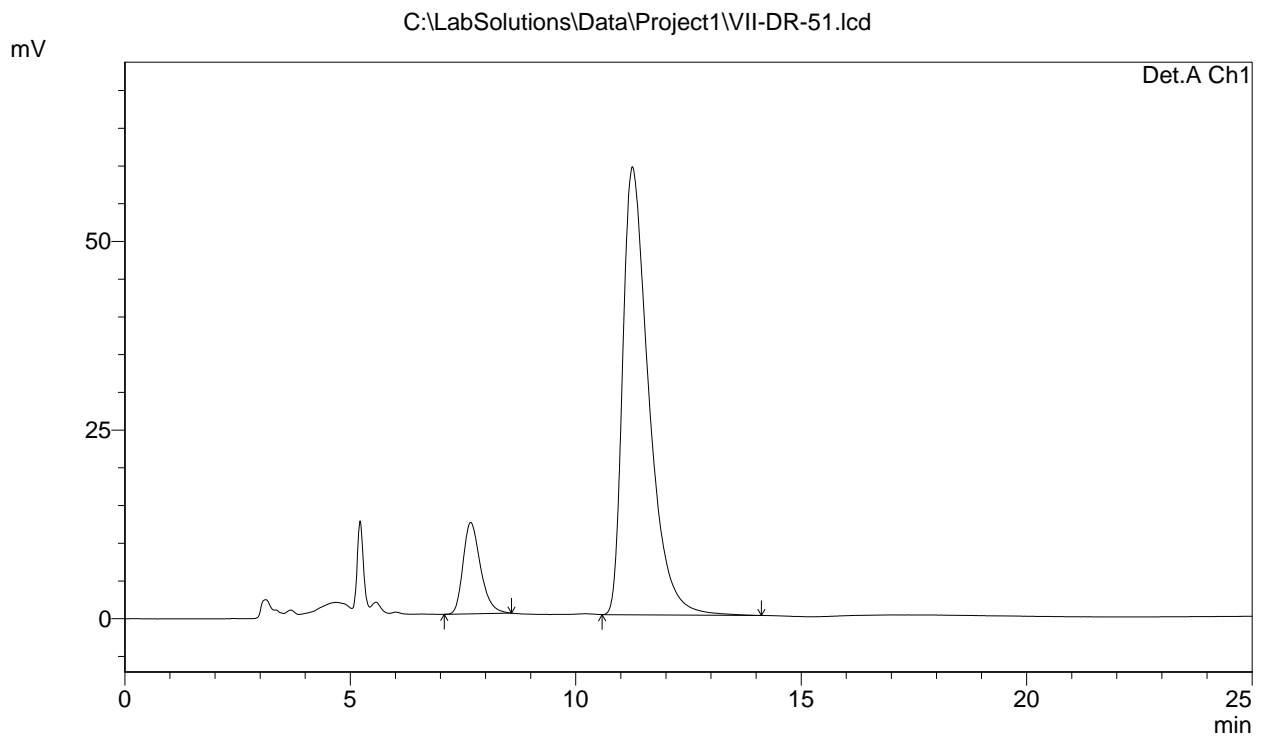

PeakTable

Detector A Ch1 254nm

| Peak# | Ret. Time | Area    | Height | Area %  | Height % |
|-------|-----------|---------|--------|---------|----------|
| 1     | 7.665     | 325950  | 12121  | 12.067  | 16.954   |
| 2     | 11.252    | 2375262 | 59376  | 87.933  | 83.046   |
| Total |           | 2701212 | 71497  | 100.000 | 100.000  |

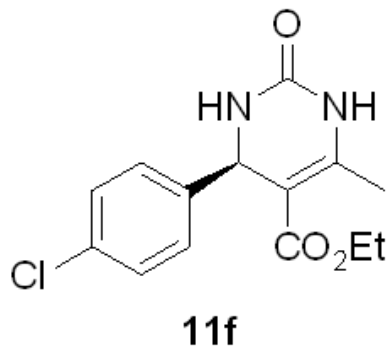

# ==== Shimadzu LCsolution LC Data Image ====

## <Chromatogram>

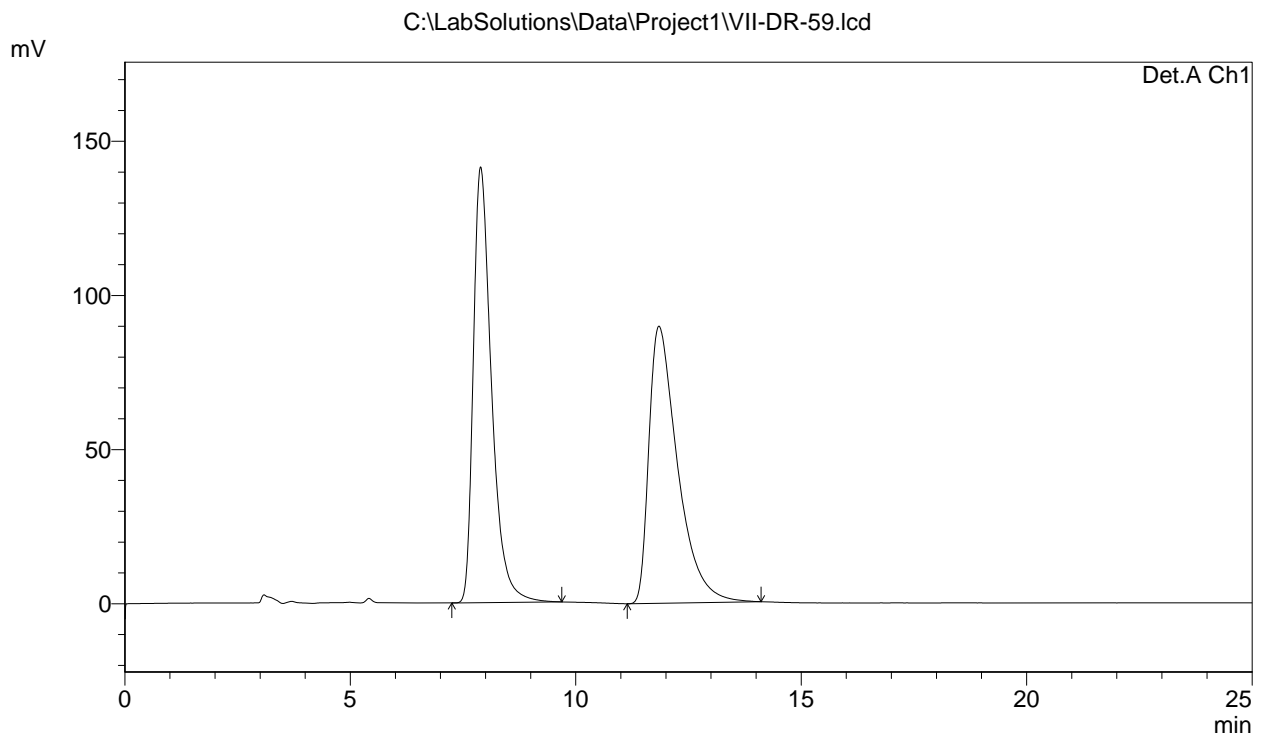

PeakTable

Detector A Ch1 254nm

| Peak# | Ret. Time | Area    | Height | Area %  | Height % |
|-------|-----------|---------|--------|---------|----------|
| 1     | 7.885     | 3967603 | 141385 | 49.965  | 61.129   |
| 2     | 11.841    | 3973178 | 89903  | 50.035  | 38.871   |
| Total |           | 7940781 | 231289 | 100.000 | 100.000  |

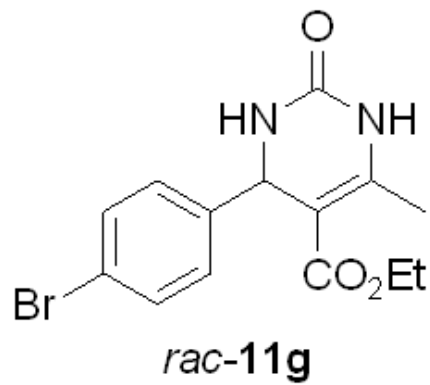

# ==== Shimadzu LCsolution LC Data Image ====

## <Chromatogram>

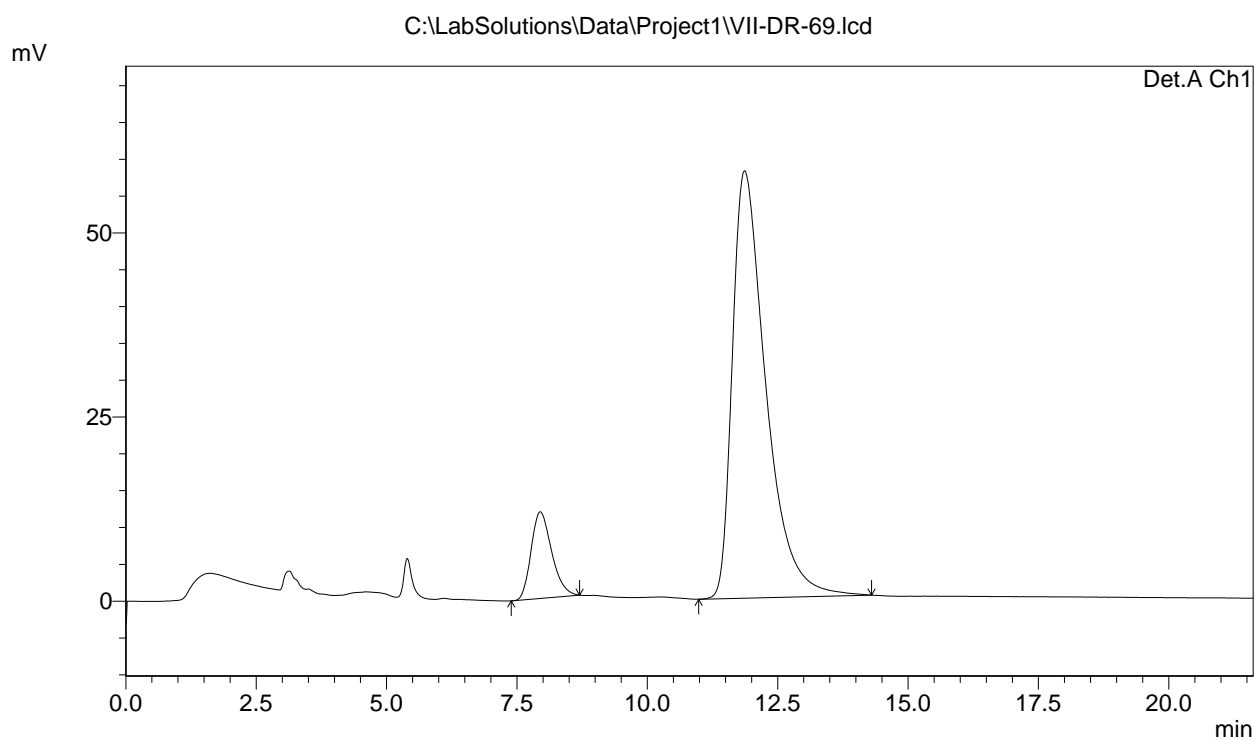

PeakTable

Detector A Ch1 254nm

| Peak# | Ret. Time | Area    | Height | Area %  | Height % |
|-------|-----------|---------|--------|---------|----------|
| 1     | 7.942     | 323339  | 11778  | 11.084  | 16.868   |
| 2     | 11.861    | 2593748 | 58046  | 88.916  | 83.132   |
| Total |           | 2917087 | 69823  | 100.000 | 100.000  |

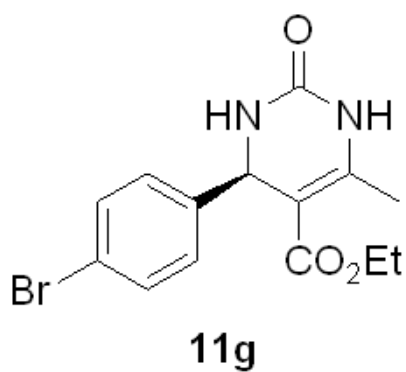

# ==== Shimadzu LCsolution LC Data Image ====

## <Chromatogram>

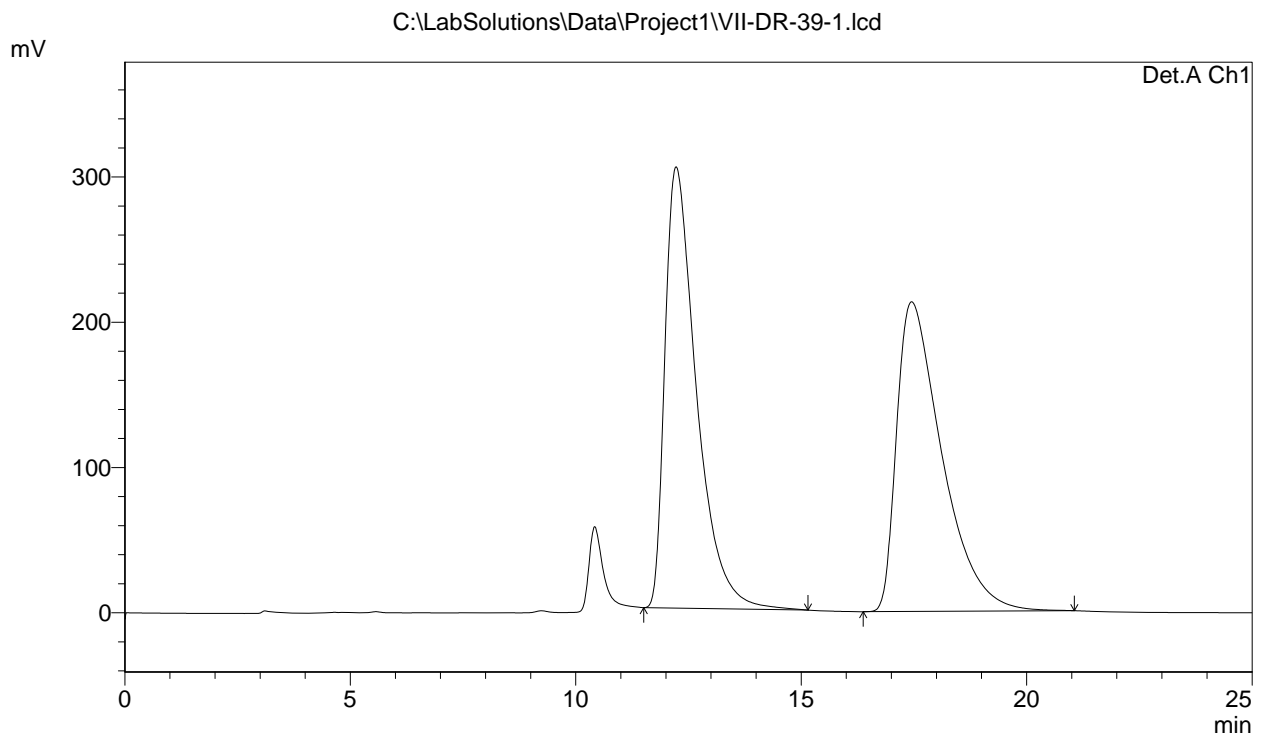

PeakTable

Detector A Ch1 254nm

| Peak# | Ret. Time | Area     | Height | Area %  | Height % |
|-------|-----------|----------|--------|---------|----------|
| 1     | 12.221    | 14737923 | 303815 | 49.799  | 58.768   |
| 2     | 17.444    | 14856830 | 213161 | 50.201  | 41.232   |
| Total |           | 29594753 | 516976 | 100.000 | 100.000  |

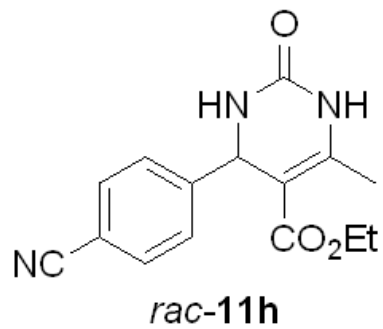



# ==== Shimadzu LCsolution LC Data Image ====

## <Chromatogram>

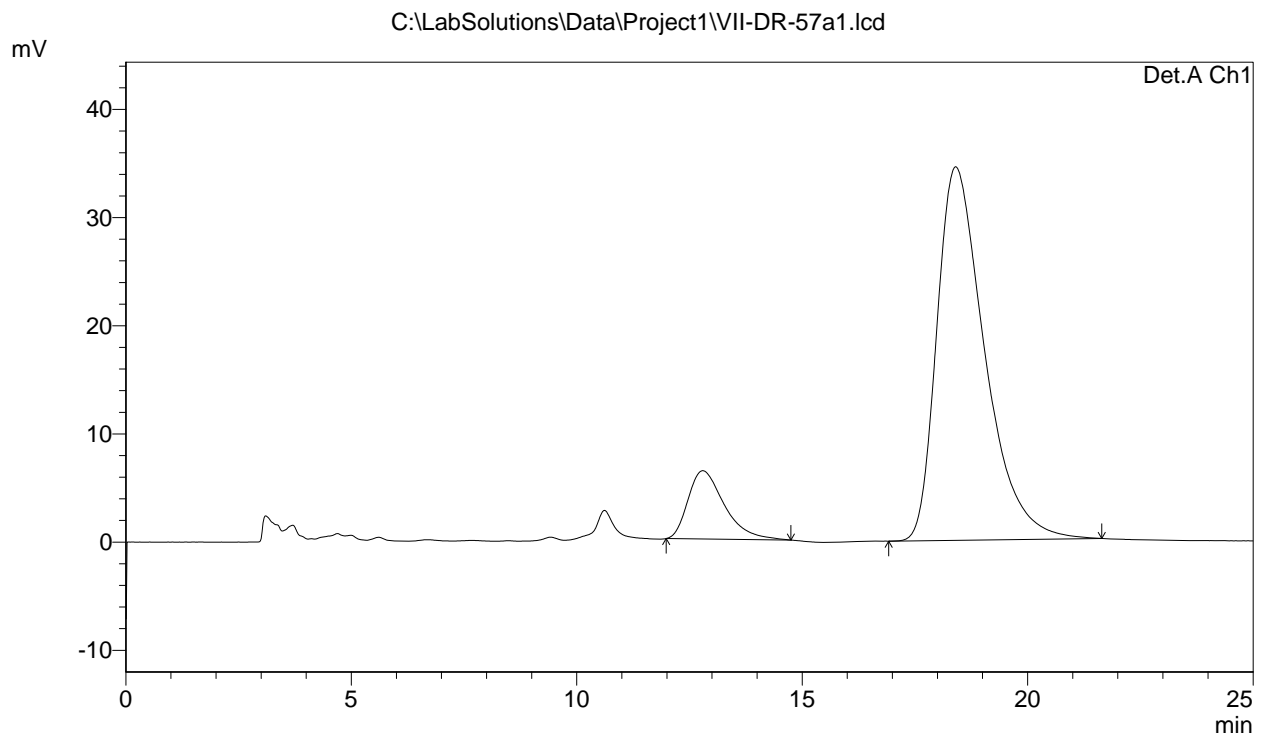

PeakTable

Detector A Ch1 254nm

| Peak# | Ret. Time | Area    | Height | Area %  | Height % |
|-------|-----------|---------|--------|---------|----------|
| 1     | 12.789    | 353274  | 6312   | 12.203  | 15.452   |
| 2     | 18.400    | 2541605 | 34539  | 87.797  | 84.548   |
| Total |           | 2894879 | 40851  | 100.000 | 100.000  |

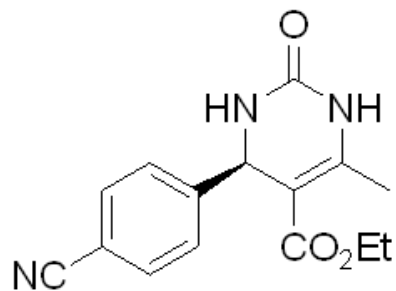

**11h**

# ==== Shimadzu LCsolution LC Data Image ====

## <Chromatogram>

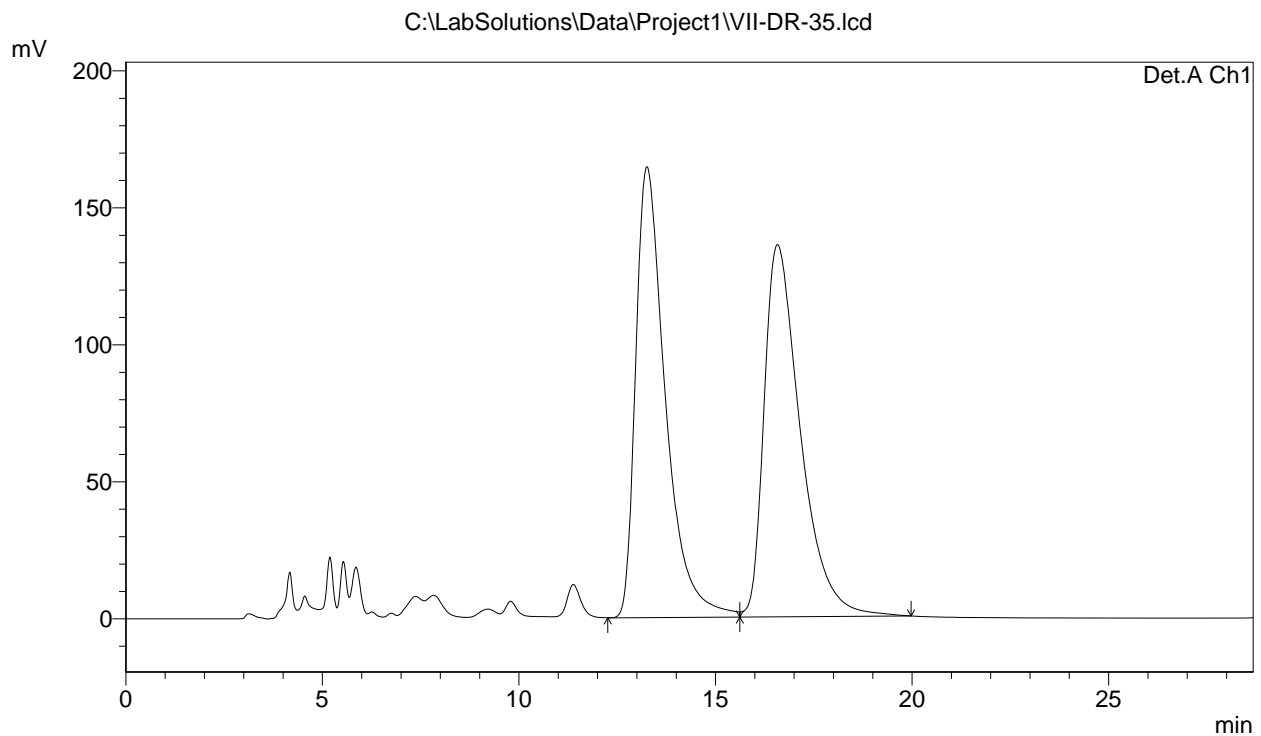

PeakTable

Detector A Ch1 254nm

| Peak# | Ret. Time | Area     | Height | Area %  | Height % |
|-------|-----------|----------|--------|---------|----------|
| 1     | 13.251    | 8637524  | 164534 | 49.817  | 54.769   |
| 2     | 16.572    | 8701094  | 135878 | 50.183  | 45.231   |
| Total |           | 17338618 | 300413 | 100.000 | 100.000  |

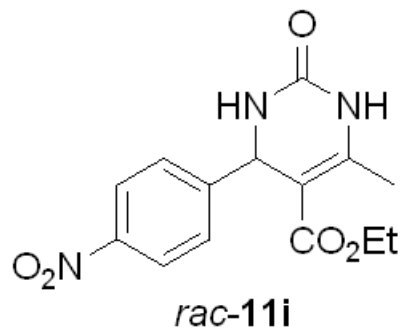

# ==== Shimadzu LCsolution LC Data Image ====

## <Chromatogram>

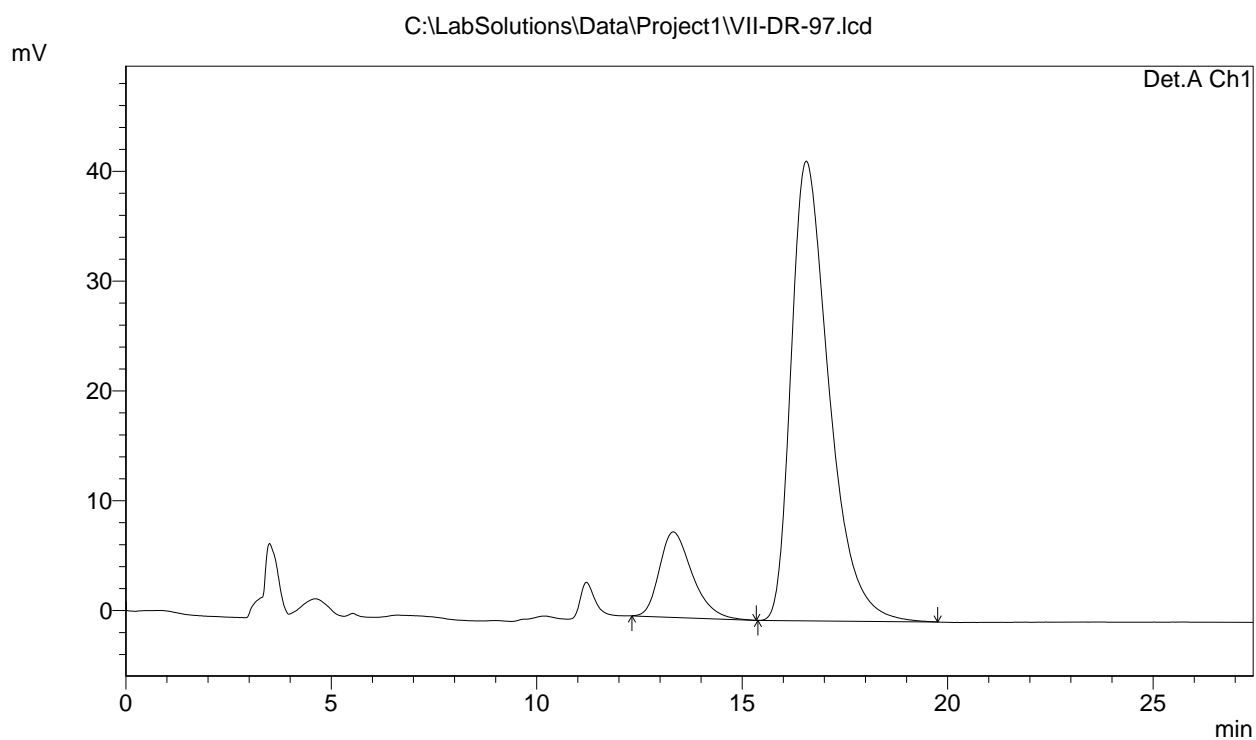

PeakTable

Detector A Ch1 254nm

| Peak# | Ret. Time | Area    | Height | Area %  | Height % |
|-------|-----------|---------|--------|---------|----------|
| 1     | 13.314    | 433929  | 7798   | 13.912  | 15.699   |
| 2     | 16.555    | 2685188 | 41876  | 86.088  | 84.301   |
| Total |           | 3119117 | 49675  | 100.000 | 100.000  |

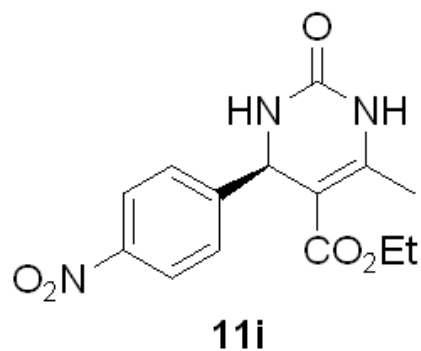

# ==== Shimadzu LCsolution LC Data Image ====

## <Chromatogram>

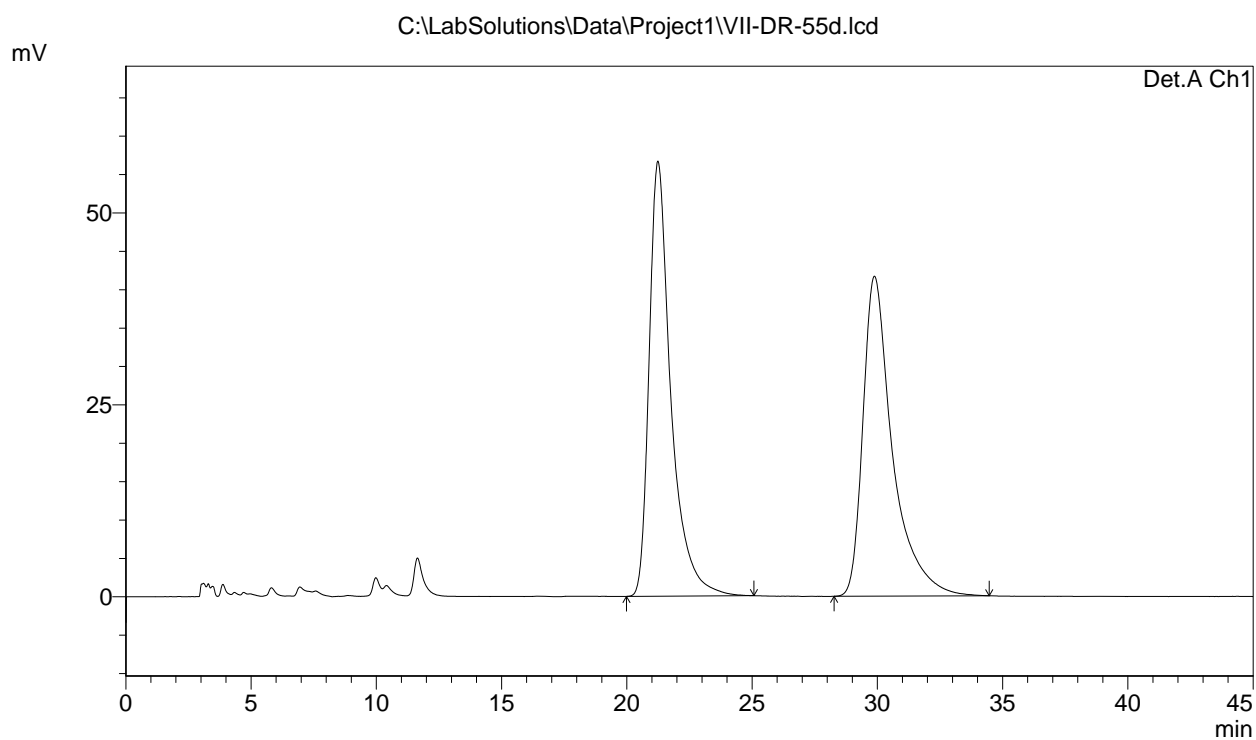

PeakTable

Detector A Ch1 254nm

| Peak# | Ret. Time | Area    | Height | Area %  | Height % |
|-------|-----------|---------|--------|---------|----------|
| 1     | 21.234    | 3417436 | 56680  | 50.047  | 57.620   |
| 2     | 29.879    | 3411064 | 41690  | 49.953  | 42.380   |
| Total |           | 6828500 | 98370  | 100.000 | 100.000  |

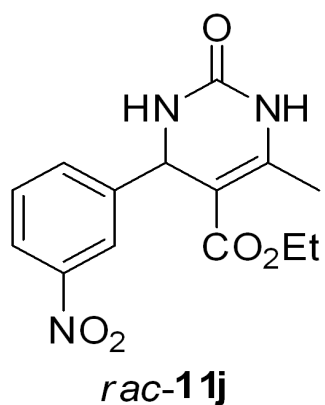

# ==== Shimadzu LCsolution LC Data Image ====

## <Chromatogram>

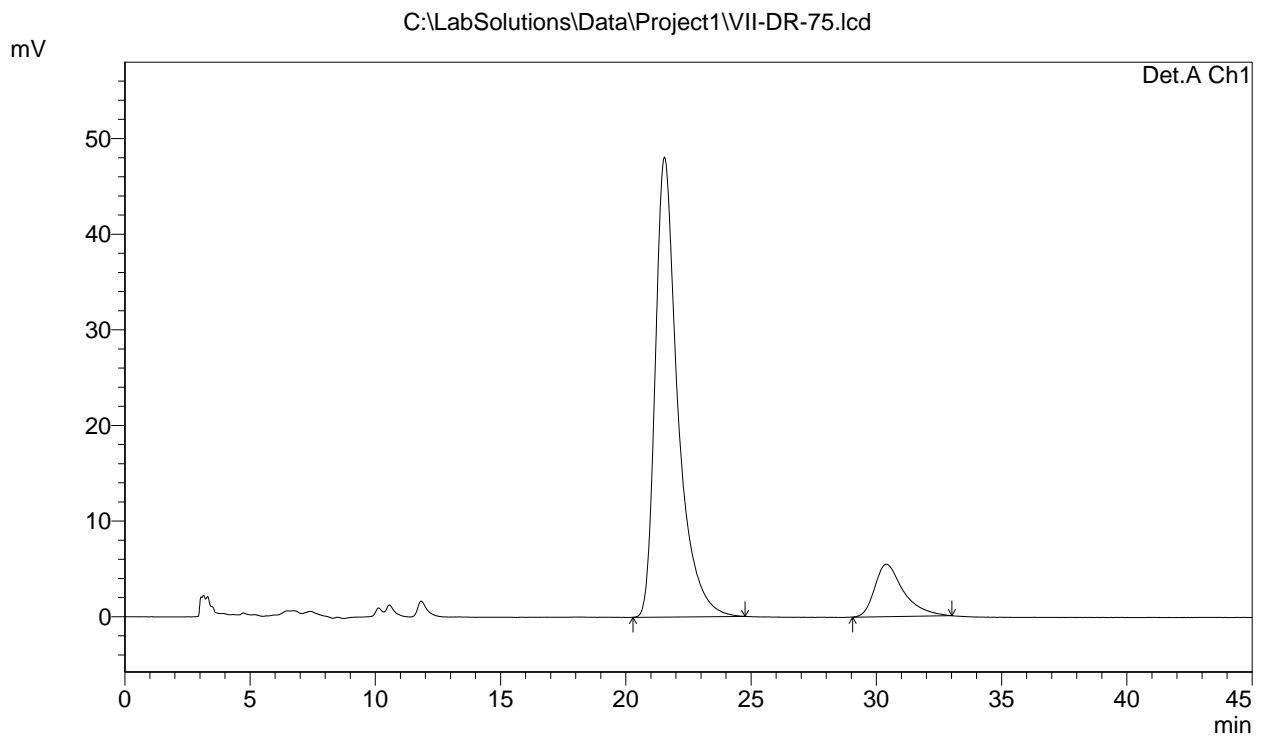

PeakTable

Detector A Ch1 254nm

| Peak# | Ret. Time | Area    | Height | Area %  | Height % |
|-------|-----------|---------|--------|---------|----------|
| 1     | 21.537    | 2987651 | 48103  | 87.147  | 89.753   |
| 2     | 30.397    | 440644  | 5492   | 12.853  | 10.247   |
| Total |           | 3428294 | 53595  | 100.000 | 100.000  |

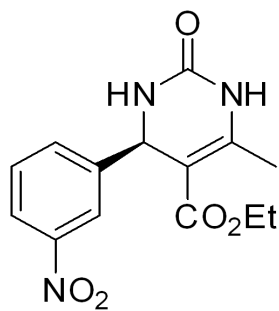

11j

# ==== Shimadzu LCsolution LC Data Image ====

## <Chromatogram>

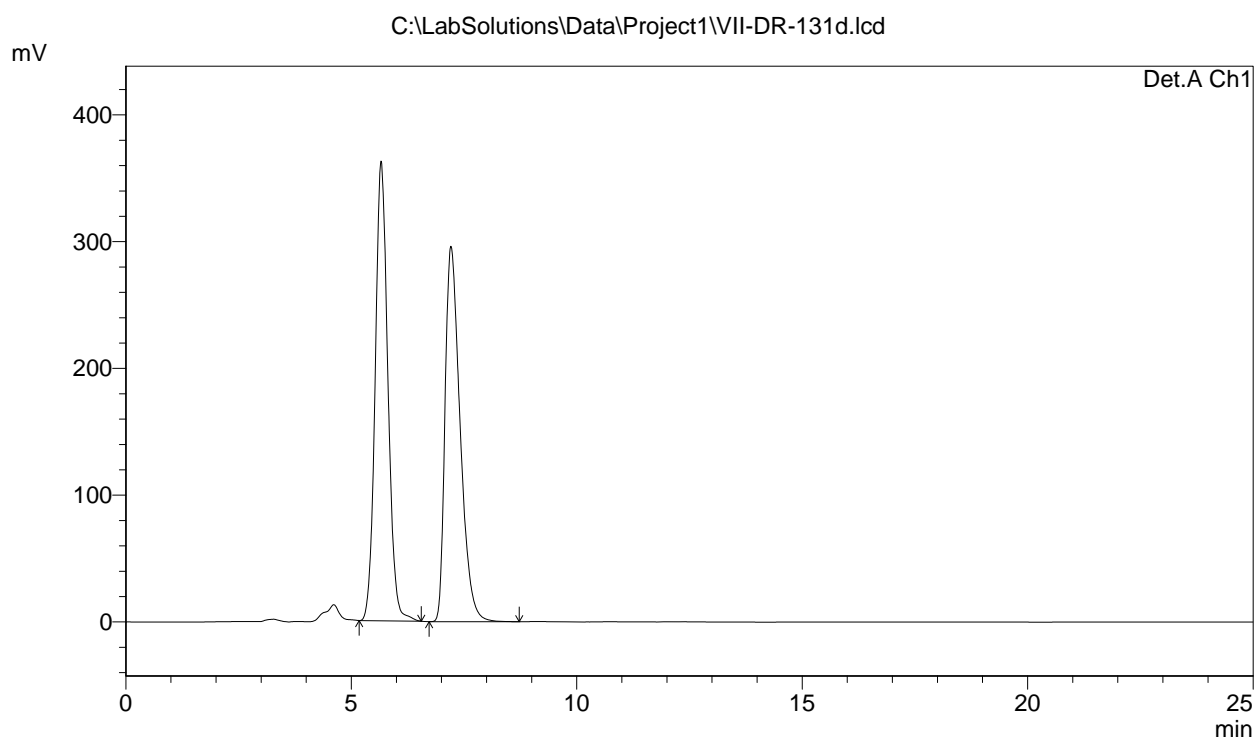

PeakTable

Detector A Ch1 254nm

| Peak# | Ret. Time | Area     | Height | Area %  | Height % |
|-------|-----------|----------|--------|---------|----------|
| 1     | 5.657     | 7104171  | 362655 | 50.831  | 55.041   |
| 2     | 7.205     | 6871956  | 296220 | 49.169  | 44.959   |
| Total |           | 13976127 | 658875 | 100.000 | 100.000  |

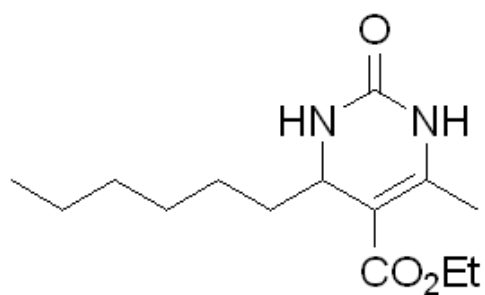

*rac-11k*

# ==== Shimadzu LCsolution LC Data Image ====

## <Chromatogram>

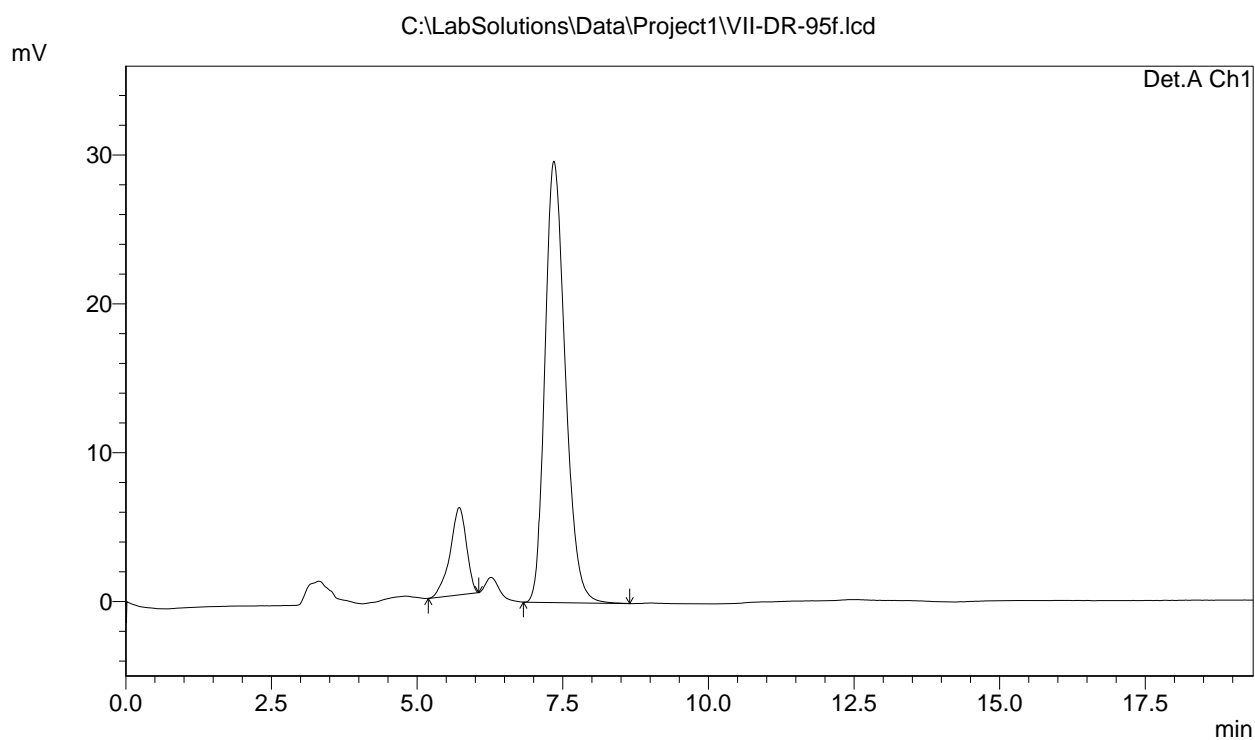

PeakTable

Detector A Ch1 254nm

| Peak# | Ret. Time | Area   | Height | Area %  | Height % |
|-------|-----------|--------|--------|---------|----------|
| 1     | 5.718     | 114802 | 5877   | 13.773  | 16.535   |
| 2     | 7.344     | 718716 | 29666  | 86.227  | 83.465   |
| Total |           | 833518 | 35542  | 100.000 | 100.000  |

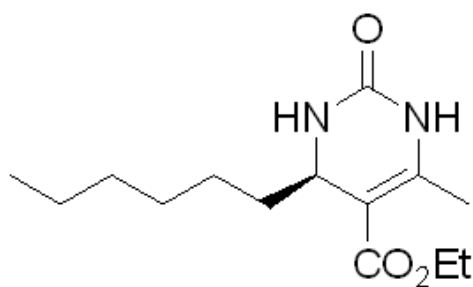

11k
